# Supplementary material for: NOVA1-Mediated SORBS2 Isoform Promotes Colorectal Cancer Migration by Activating the Notch Pathway
Source: Front Cell Dev Biol. 2021 Oct 8;9:673873. doi: 10.3389/fcell.2021.673873 (PMC8531477; doi:10.3389/fcell.2021.673873)
Supplement: Supplementary file 3 [file Table_2.XLSX]

## Sheet: Sheet1
serial number	gender(1=male/2=female)	age(years)	diagnosis	status(0=survival/1=die)	DFS(months)	OS(months)	T	N	M	stage
1	2	65	Sigmoid carcinoma	1	14	17	4	1	0	III
2	2	79	Rectum sigmoid junction malignant tumor	1	32	42	3	0	0	II
3	1	52	Transverse colon malignant tumor	1	25	35	4	1	0	III
4	1	69	Malignant tumor of rectum	1	33	38	3	0	0	II
10	1	73	Sigmoid carcinoma	1	16	16	2	0	0	I
