# Supplementary material for: NOVA1-Mediated SORBS2 Isoform Promotes Colorectal Cancer Migration by Activating the Notch Pathway
Source: Front Cell Dev Biol. 2021 Oct 8;9:673873. doi: 10.3389/fcell.2021.673873 (PMC8531477; doi:10.3389/fcell.2021.673873)
Supplement: Supplementary file 5 [file Table_4.XLSX]

## Sheet: Sheet1
Gene name	Gene ID	logFC	P.Value	adj.P.Val
MARCH4	220972	1.19152	4.28e-23	1.4e-21
A1CF	29974	1.12797	1.86e-13	1.44e-12
A2M	2	1.24244	1.95e-11	1.15e-10
ABCA10	10349	1.39322	2.12e-12	1.44e-11
ABCA5	23461	1.03228	5.57e-13	4.05e-12
ABCA8	10351	2.74702	1.03e-43	1.44e-40
ABCB1	5243	1.76834	4.16e-10	2.08e-09
ABCC1	4363	-1.08294	3.69e-15	3.59e-14
ABCC8	6833	1.06729	3.28e-10	1.66e-09
ABCD3	5825	1.07606	7.03e-17	8.87e-16
ABCG2	9429	3.23773	6.76e-31	9.91e-29
ABHD3	171586	1.87892	5.62e-25	2.49e-23
ABI3BP	25890	2.31013	1.07e-25	5.38e-24
ACAA2	10449	1.64386	8.1e-21	1.88e-19
ACACB	32	1.33389	4.96e-21	1.19e-19
ACADM	34	1.3082	1.06e-14	9.73e-14
ACADS	35	2.03811	2.51e-26	1.38e-24
ACAN	176	-1.59594	1.26e-20	2.83e-19
ACAT1	38	1.30815	6.68e-23	2.13e-21
ACD	65057	-1.08608	1.56e-24	6.38e-23
ACHE	43	1.05752	5.6e-08	2.13e-07
ACKR2	1238	1.56577	2.44e-24	9.79e-23
ACOX1	51	1.27824	1.66e-15	1.69e-14
ACSF2	80221	1.44443	1.99e-16	2.35e-15
ACSL6	23305	-2.06328	1.06e-14	9.67e-14
ACSM3	6296	1.13855	3.12e-09	1.38e-08
ACTG2	72	2.85063	1.64e-09	7.56e-09
ACTL10	170487	-1.1263	3.77e-15	3.66e-14
ACTR3B	57180	-1.20071	2.52e-28	2.02e-26
ACVRL1	94	1.42912	1.73e-16	2.06e-15
ADAM12	8038	-1.64272	7.11e-16	7.67e-15
ADAM33	80332	1.25285	9.19e-12	5.7e-11
ADAM8	101	-1.07561	1.64e-09	7.53e-09
ADAMDEC1	27299	3.42546	7.44e-27	4.53e-25
ADAMTS1	9510	1.34528	1.29e-08	5.31e-08
ADAMTS12	81792	-1.61514	6.8e-20	1.37e-18
ADAMTS2	9509	-1.80966	2.73e-17	3.72e-16
ADAMTSL1	92949	1.11023	9.25e-23	2.9e-21
ADAMTSL3	57188	1.34825	9.75e-14	7.83e-13
ADAMTSL4	54507	1.01925	1.74e-11	1.04e-10
ADCY3	109	-1.10632	5.14e-16	5.69e-15
ADCY5	111	1.81981	5.57e-24	2.11e-22
ADCY9	115	1.16282	7.56e-16	8.12e-15
ADH1B	125	3.92991	7.12e-34	1.82e-31
ADH6	130	1.42987	2.6e-15	2.58e-14
ADHFE1	137872	1.98284	1.56e-28	1.34e-26
ADORA3	140	1.51731	1.15e-16	1.41e-15
ADRA2A	150	1.46426	3.01e-11	1.73e-10
ADRA2C	152	-1.10684	2.74e-07	9.5e-07
ADRM1	11047	-1.10419	1.59e-20	3.49e-19
ADTRP	84830	3.85985	5.84e-26	3.08e-24
AEN	64782	-1.46677	1.25e-24	5.19e-23
AGAP2-AS1	100130776	-1.01464	9.05e-18	1.32e-16
AGAP3	116988	-1.26174	5.66e-29	5.27e-27
AGPAT9	79888	2.70423	1.52e-32	2.79e-30
AGR3	155465	1.96136	4.63e-09	2.01e-08
AGRN	375790	-1.20862	2.93e-17	3.95e-16
AGT	183	-1.76236	3.87e-13	2.88e-12
AGTR1	185	1.51918	5.16e-13	3.78e-12
AGTRAP	57085	-1.04907	1.63e-18	2.66e-17
AHCY	191	-1.80321	1.2e-28	1.06e-26
AHCYL2	23382	2.6982	5.57e-28	4.16e-26
AHNAK	79026	1.82613	2.44e-15	2.43e-14
AIF1	199	1.05287	2.35e-08	9.39e-08
AJUBA	84962	-2.08996	5.93e-41	5.51e-38
AKAP12	9590	1.55656	1.86e-09	8.53e-09
AKAP7	9465	1.21193	1.09e-12	7.62e-12
AKAP9	10142	1.07737	1.07e-12	7.48e-12
AKR1B10	57016	3.85876	1.15e-28	1.02e-26
AKR1C2	1646	1.26262	1.61e-20	3.54e-19
AKR1C3	8644	1.40709	1.3e-09	6.06e-09
ALDH1A1	216	1.7327	8.78e-10	4.21e-09
ALDH4A1	8659	-1.6092	1.65e-21	4.29e-20
ALG3	10195	-1.07409	8.36e-26	4.32e-24
ALKBH2	121642	-1.25688	5.94e-28	4.42e-26
ALPI	248	3.12223	1.96e-32	3.53e-30
AMH	268	-2.0032	2.33e-15	2.33e-14
AMICA1	120425	1.33141	1.47e-15	1.52e-14
AMN	81693	1.53452	2.68e-09	1.2e-08
AMOTL1	154810	1.51273	1.61e-08	6.53e-08
AMPD1	270	1.46769	4.12e-26	2.21e-24
AMPD2	271	-1.21273	2.29e-28	1.87e-26
ANGPTL1	9068	2.48852	1.15e-22	3.54e-21
ANGPTL7	10218	1.35572	4.7e-16	5.24e-15
ANK2	287	2.29519	1.05e-22	3.26e-21
ANK3	288	1.26498	7.55e-24	2.8e-22
ANKRD12	23253	1.22396	3.82e-10	1.92e-09
ANKRD13B	124930	-2.21686	6.1e-29	5.63e-27
ANKRD33B	651746	1.18735	1.3e-15	1.35e-14
ANKS1B	56899	1.32552	1.97e-14	1.73e-13
ANKS6	203286	-1.1093	1.88e-22	5.66e-21
ANKZF1	55139	-1.0462	8.77e-22	2.38e-20
ANLN	54443	-1.63648	2.3e-18	3.66e-17
ANO10	55129	1.05269	6.65e-19	1.15e-17
ANO5	203859	1.48021	1.19e-37	6.49e-35
ANO9	338440	-1.14545	2.79e-08	1.1e-07
ANPEP	290	4.05488	1.5e-20	3.32e-19
ANTXR2	118429	1.15387	1.51e-13	1.19e-12
ANXA3	306	-1.36768	7.4e-12	4.66e-11
AOC1	26	1.73477	1.04e-19	2.05e-18
AOC3	8639	2.04222	3.87e-13	2.88e-12
AP1S3	130340	-1.13754	5.86e-15	5.53e-14
APBB1	322	1.33099	3.31e-11	1.89e-10
APC	324	1.15323	2.1e-10	1.09e-09
APCDD1	147495	-1.55882	1.15e-06	3.65e-06
APLN	8862	-1.98476	8.88e-25	3.77e-23
APOBEC3A	200315	1.29547	1.53e-07	5.48e-07
APOBEC3B	9582	1.06601	9.85e-08	3.61e-07
APOBR	55911	1.70309	1.86e-14	1.65e-13
APOD	347	1.1541	1.17e-05	3.23e-05
APPL2	55198	1.60898	2.14e-22	6.42e-21
AQP1	358	1.02381	1.21e-06	3.83e-06
AQP7	364	1.61466	4.29e-14	3.6e-13
AQP8	343	6.86774	3.47e-30	4.23e-28
AQP9	366	-1.44237	6.6e-09	2.81e-08
AREG	374	-1.50014	6.99e-06	1.99e-05
ARFGAP1	55738	-1.24746	1.74e-21	4.5e-20
ARHGAP33	115703	-1.03294	6e-10	2.93e-09
ARHGAP44	9912	2.28921	1.32e-26	7.62e-25
ARHGEF19	128272	-1.19029	3.63e-17	4.82e-16
ARHGEF25	115557	1.57899	3.53e-10	1.78e-09
ARHGEF37	389337	1.53425	6.4e-21	1.51e-19
ARID3A	1820	-1.92393	3.96e-17	5.23e-16
ARL14	80117	2.36445	1.3e-21	3.45e-20
ARL4D	379	1.40114	1.18e-11	7.21e-11
ARMCX1	51309	1.38249	2.87e-14	2.48e-13
ARNTL2	56938	-1.67769	6.31e-24	2.36e-22
ARRDC4	91947	1.52362	1.96e-21	5.02e-20
ASAP3	55616	1.54877	5.26e-22	1.48e-20
ASB2	51676	2.02384	1.2e-18	1.99e-17
ASB5	140458	1.00593	1.07e-07	3.89e-07
ASB9	140462	-1.63195	6.3e-15	5.92e-14
ASCL2	430	-3.08437	8.97e-21	2.07e-19
ASF1B	55723	-1.14031	2.76e-17	3.74e-16
ASGR1	432	-1.09064	6.93e-10	3.36e-09
ASIC1	41	-1.35419	1.18e-15	1.23e-14
ASNS	440	-1.29451	6.45e-20	1.3e-18
ASPA	443	2.8443	3.45e-36	1.47e-33
ASPG	374569	1.66962	5.09e-12	3.27e-11
ASPHD1	253982	-1.70023	1.16e-18	1.93e-17
ASUN	55726	-1.01489	1.09e-11	6.7e-11
ATAD2	29028	-1.25174	7.5e-13	5.38e-12
ATAD3A	55210	-1.20963	1.51e-20	3.33e-19
ATAD3B	83858	-1.23912	3.35e-16	3.82e-15
ATCAY	85300	1.5571	1.24e-20	2.78e-19
ATG9B	285973	-2.88292	7.32e-28	5.32e-26
ATHL1	80162	-2.45481	3.07e-18	4.8e-17
ATIC	471	-1.08722	3.48e-27	2.22e-25
ATL1	51062	1.12992	1.68e-18	2.72e-17
ATOH1	474	1.60342	1.59e-07	5.69e-07
ATP11A	23250	-1.93311	1.11e-25	5.52e-24
ATP13A4	84239	1.57386	6.86e-18	1.01e-16
ATP1A2	477	2.88192	2.09e-20	4.53e-19
ATP1B2	482	1.7608	2.91e-21	7.26e-20
ATP2A3	489	1.42539	2.6e-12	1.73e-11
ATP2B4	493	1.59214	4.63e-10	2.29e-09
ATP5EP2	432369	-1.14398	3.91e-10	1.96e-09
ATP6V0D2	245972	1.75393	9.66e-14	7.77e-13
ATP6V1C2	245973	-1.53166	4.84e-22	1.38e-20
ATP6V1F	9296	-1.06763	9.39e-24	3.45e-22
ATP8A1	10396	1.44706	1.53e-14	1.37e-13
ATP8B1	5205	1.53884	6.44e-22	1.79e-20
ATRNL1	26033	1.09161	3.21e-11	1.84e-10
AUNIP	79000	-1.74461	1.84e-25	8.82e-24
AURKA	6790	-1.31669	1.99e-17	2.76e-16
AURKB	9212	-1.22206	3.31e-15	3.24e-14
AXDND1	126859	1.53817	7.09e-11	3.9e-10
AXIN2	8313	-1.9791	5.29e-16	5.82e-15
AZGP1	563	-2.89079	2.97e-22	8.84e-21
B3GALT1	8708	1.81244	1.27e-34	3.83e-32
B3GALT4	8705	1.39481	3.04e-25	1.4e-23
B3GALT5	10317	2.49367	4.2e-22	1.21e-20
B3GNT6	192134	2.16799	1.71e-11	1.02e-10
B3GNT7	93010	2.89188	1.43e-15	1.48e-14
B3GNT8	374907	1.31001	4.04e-16	4.56e-15
B3GNTL1	146712	-1.08853	1.63e-28	1.39e-26
B4GALNT2	124872	4.09179	3e-21	7.47e-20
B4GALNT4	338707	-1.26818	8.98e-05	0.000217993
B9D1	27077	-1.17023	2.45e-13	1.87e-12
BACE2	25825	-1.23588	5.62e-12	3.59e-11
BAMBI	25805	-1.19382	1.94e-07	6.86e-07
BANK1	55024	1.21667	3.75e-06	1.11e-05
BARX2	8538	1.79546	1.56e-12	1.08e-11
BCAR3	8412	1.23664	1.33e-27	9.14e-26
BCAS1	8537	2.40885	1.89e-23	6.7e-22
BCHE	590	2.30877	1.39e-21	3.66e-20
BCL2	596	1.16867	8.83e-20	1.75e-18
BCL2L12	83596	-1.09147	2.09e-23	7.27e-22
BCL2L15	440603	1.39457	1.15e-14	1.04e-13
BDH2	56898	1.06178	3.96e-13	2.94e-12
BDKRB1	623	1.03609	3.39e-17	4.54e-16
BEND5	79656	1.05075	2.97e-16	3.4e-15
BEST2	54831	2.89294	6.27e-24	2.36e-22
BEST4	266675	4.62201	2.66e-53	2.61e-49
BEX1	55859	1.42626	1.71e-18	2.77e-17
BEX4	56271	1.93933	1.36e-19	2.63e-18
BGN	633	-2.38111	1.46e-17	2.06e-16
BHLHE40	8553	-1.09909	6.84e-13	4.91e-12
BHLHE41	79365	1.07844	3.58e-08	1.4e-07
BID	637	-1.09262	5.64e-22	1.58e-20
BIN2	51411	1.01475	1.1e-12	7.7e-12
BIRC3	330	1.17113	5.51e-07	1.82e-06
BIRC5	332	-1.39123	2.04e-18	3.26e-17
BMP2	650	1.64548	3.74e-18	5.74e-17
BMP3	651	3.27526	1.11e-43	1.45e-40
BMP4	652	-1.72421	7.68e-17	9.66e-16
BMP5	653	1.52444	5.8e-30	6.82e-28
BMP6	654	1.04136	1.88e-17	2.62e-16
BMP7	655	-2.03865	1.61e-14	1.43e-13
BMX	660	1.42527	6.73e-27	4.14e-25
BOC	91653	1.26989	1.01e-06	3.22e-06
BOP1	23246	-1.82287	3.91e-27	2.48e-25
BRAT1	221927	-1.06298	2.02e-30	2.58e-28
BRINP3	339479	1.81384	1.48e-17	2.1e-16
BST1	683	1.01026	5.79e-09	2.48e-08
BTK	695	1.02654	2.99e-11	1.72e-10
BTNL3	10917	2.60863	8.58e-22	2.33e-20
BTNL8	79908	2.92558	1.4e-23	5.02e-22
BUB1	699	-1.23736	1.44e-15	1.48e-14
BUB1B	701	-1.12379	6.52e-10	3.17e-09
BVES	11149	1.07177	1.39e-09	6.47e-09
BYSL	705	-1.50876	1.57e-37	8.13e-35
C10orf2	56652	-1.59053	4.59e-34	1.2e-31
C10orf35	219738	-1.19896	4.15e-16	4.66e-15
C10orf54	64115	1.24837	2.4e-23	8.26e-22
C10orf99	387695	2.63744	7.34e-15	6.86e-14
C11orf82	220042	-1.5362	1.45e-16	1.76e-15
C11orf84	144097	-1.45105	2.33e-28	1.89e-26
C11orf86	254439	3.53579	1.89e-29	2e-27
C12orf36	283422	1.36113	3.92e-07	1.33e-06
C14orf132	56967	1.13791	2.51e-16	2.92e-15
C14orf79	122616	-1.0657	2.03e-19	3.82e-18
C15orf48	84419	2.92927	1.3e-22	3.99e-21
C16orf13	84326	-1.34904	2.3e-29	2.37e-27
C16orf45	89927	1.02101	3.95e-08	1.53e-07
C16orf59	80178	-1.42961	3.24e-27	2.08e-25
C16orf62	57020	1.42086	5.21e-14	4.33e-13
C16orf89	146556	2.98856	1.71e-31	2.83e-29
C17orf77	146723	-1.58557	3.56e-09	1.57e-08
C19orf24	55009	-1.04259	1.69e-22	5.13e-21
C19orf33	64073	1.32876	1.28e-09	5.99e-09
C19orf45	374877	-1.72701	4.4e-25	1.98e-23
C19orf48	84798	-1.81471	1.98e-29	2.06e-27
C19orf60	55049	-1.0836	1.16e-14	1.05e-13
C1orf115	79762	2.23493	8.84e-26	4.54e-24
C1orf186	440712	1.82001	3.8e-24	1.48e-22
C1orf210	149466	1.43828	4.6e-24	1.78e-22
C1orf95	375057	1.35372	7.96e-13	5.68e-12
C1QA	712	1.25117	1.52e-10	8e-10
C1QTNF7	114905	2.51639	1.86e-25	8.88e-24
C2	717	-1.48272	4.27e-14	3.59e-13
C20orf27	54976	-1.12362	3.68e-13	2.75e-12
C21orf88	114041	2.14259	1.42e-11	8.55e-11
C2CD4A	145741	-2.52512	8.22e-24	3.04e-22
C2CD4B	388125	-1.09444	1.08e-06	3.45e-06
C2orf40	84417	3.09855	8.15e-29	7.44e-27
C2orf61	285051	-1.69437	1.03e-17	1.5e-16
C2orf70	339778	-2.49133	1.59e-27	1.08e-25
C2orf72	257407	1.08822	9.12e-12	5.66e-11
C2orf88	84281	3.74474	2.32e-36	1.09e-33
C3orf70	285382	1.01062	1.63e-11	9.75e-11
C4BPB	725	-1.00223	5.15e-06	1.5e-05
C4orf19	55286	1.59439	4.05e-21	9.81e-20
C4orf48	401115	-1.20059	4.43e-07	1.49e-06
C5orf30	90355	1.2143	1.56e-17	2.2e-16
C5orf38	153571	-1.12158	2.84e-05	7.43e-05
C6orf15	29113	-1.25832	7.2e-07	2.34e-06
C6orf223	221416	-3.28991	2.6e-36	1.19e-33
C6orf48	50854	-1.23887	1.55e-19	2.97e-18
C7	730	3.29456	3.29e-22	9.66e-21
C7orf31	136895	1.30112	3.65e-21	8.97e-20
C8G	733	1.09333	1.45e-06	4.53e-06
C8orf88	100127983	1.51485	2.28e-12	1.53e-11
C9orf116	138162	-1.062	2.42e-13	1.85e-12
C9orf117	286207	-1.09102	4.87e-31	7.46e-29
C9orf16	79095	-1.0116	1.88e-19	3.56e-18
CA1	759	6.79861	6.46e-36	2.54e-33
CA12	771	2.28229	1.64e-18	2.67e-17
CA2	760	5.02746	2.46e-29	2.51e-27
CA4	762	5.66281	1.23e-29	1.36e-27
CA7	766	5.33285	6.63e-59	1.3e-54
CA9	768	-3.10675	3.85e-18	5.89e-17
CACNB2	783	1.07051	2.9e-17	3.92e-16
CAD	790	-1.45863	7.3e-25	3.14e-23
CADM1	23705	1.00528	1.71e-07	6.08e-07
CADM3	57863	2.98528	4.68e-39	3.41e-36
CADPS	8618	-1.08249	9.04e-10	4.32e-09
CALB2	794	1.99345	1.09e-17	1.57e-16
CALCOCO2	10241	1.01041	1.45e-16	1.76e-15
CALD1	800	1.17339	0.000137193	0.000324188
CAMK2N1	55450	1.24667	2.02e-15	2.04e-14
CAMK4	814	1.4878	8.85e-17	1.1e-15
CAP2	10486	1.30388	1.3e-08	5.35e-08
CAPN12	147968	-1.37246	1.39e-10	7.4e-10
CAPN13	92291	1.6647	9.53e-13	6.75e-12
CAPN2	824	1.05215	3.53e-15	3.45e-14
CAPN5	726	1.16643	3.01e-16	3.44e-15
CAPN9	10753	1.38693	1.4e-08	5.71e-08
CARD14	79092	-1.77803	8.99e-20	1.78e-18
CARS2	79587	-1.0024	6.09e-19	1.06e-17
CASD1	64921	1.34625	1.44e-11	8.63e-11
CASP5	838	2.1467	4.8e-15	4.59e-14
CASP7	840	1.51361	5.52e-24	2.1e-22
CASQ2	845	2.37492	1.25e-13	9.87e-13
CAV1	857	1.55087	3.21e-10	1.63e-09
CBFB	865	-1.27047	3.68e-18	5.66e-17
CBX2	84733	-1.82647	1.96e-24	7.92e-23
CBX4	8535	-1.48404	8.99e-31	1.28e-28
CBX7	23492	1.58069	4.55e-19	8.08e-18
CBX8	57332	-1.31319	3.13e-34	8.43e-32
CCBE1	147372	1.36637	1.5e-13	1.18e-12
CCDC113	29070	-1.49666	8.35e-17	1.04e-15
CCDC129	223075	1.05627	6.81e-11	3.75e-10
CCDC152	100129792	1.17735	1.08e-23	3.91e-22
CCDC68	80323	2.02735	1.27e-25	6.3e-24
CCDC69	26112	2.36128	4.99e-20	1.03e-18
CCDC78	124093	-1.8346	3.97e-23	1.32e-21
CCDC80	151887	1.83902	1.5e-11	8.97e-11
CCDC85B	11007	-1.41985	2.18e-15	2.19e-14
CCDC86	79080	-1.24801	1.7e-24	6.92e-23
CCL13	6357	1.78056	1.33e-10	7.06e-10
CCL19	6363	2.09922	6.24e-11	3.46e-10
CCL20	6364	-1.26439	4.8e-06	1.4e-05
CCL21	6366	2.30341	3.93e-15	3.81e-14
CCL24	6369	-1.7629	2.11e-09	9.6e-09
CCL28	56477	2.50457	4.76e-18	7.19e-17
CCL5	6352	1.23918	1.08e-07	3.93e-07
CCL8	6355	1.47492	3.88e-10	1.95e-09
CCNB1	891	-1.4427	3.49e-18	5.39e-17
CCNB1IP1	57820	-1.08607	6.03e-19	1.05e-17
CCNB2	9133	-1.00139	2.79e-13	2.11e-12
CCND1	595	-1.58681	8.39e-28	6.02e-26
CCNE1	898	-1.29338	4.12e-23	1.36e-21
CCNF	899	-1.41559	1.06e-24	4.42e-23
CCNJL	79616	1.15121	1.27e-10	6.75e-10
CCNO	10309	-2.20488	1.99e-27	1.33e-25
CCNYL1	151195	1.28343	3.48e-20	7.35e-19
CCR2	729230	1.25077	3.57e-17	4.75e-16
CCT2	10576	-1.04618	4.35e-25	1.96e-23
CCT3	7203	-1.00127	1.58e-29	1.69e-27
CCT6A	908	-1.14149	3.28e-25	1.5e-23
CD163L1	283316	2.32963	3.76e-21	9.2e-20
CD209	30835	1.56178	5.61e-20	1.15e-18
CD22	933	2.01847	2.22e-10	1.14e-09
CD24	100133941	1.03271	3.49e-06	1.04e-05
CD27	939	1.50708	4.34e-17	5.68e-16
CD276	80381	-1.17662	1.24e-18	2.06e-17
CD36	948	2.24559	6.99e-22	1.93e-20
CD3EAP	10849	-1.15108	1.56e-25	7.57e-24
CD44	960	-1.32114	3.64e-19	6.57e-18
CD48	962	1.55193	4.58e-13	3.36e-12
CD52	1043	1.15838	2.31e-08	9.24e-08
CD79A	973	2.46576	5.84e-15	5.52e-14
CD79B	974	1.47338	6.91e-11	3.8e-10
CD96	10225	1.40634	4.47e-13	3.29e-12
CDA	978	1.21115	3.3e-07	1.13e-06
CDC14A	8556	1.74058	6.24e-20	1.26e-18
CDC20	991	-1.2271	5.2e-15	4.95e-14
CDC25B	994	-2.21153	5.35e-31	8.14e-29
CDC45	8318	-1.60789	4.24e-24	1.65e-22
CDC6	990	-1.37962	5.56e-18	8.32e-17
CDCA3	83461	-1.37862	1.33e-25	6.56e-24
CDCA4	55038	-1.35629	1.8e-26	1.02e-24
CDCA5	113130	-1.53045	5.73e-23	1.85e-21
CDCA7	83879	-1.55097	1.94e-18	3.12e-17
CDCA8	55143	-1.13748	1.79e-19	3.39e-18
CDH11	1009	-1.30689	3.97e-14	3.36e-13
CDH19	28513	1.1532	6.31e-15	5.93e-14
CDH3	1001	-5.73814	8.99e-53	4.41e-49
CDHR2	54825	1.90949	1.86e-12	1.26e-11
CDHR5	53841	2.07601	1.97e-18	3.16e-17
CDIP1	29965	1.08985	9.89e-12	6.1e-11
CDK1	983	-1.32452	6.25e-11	3.46e-10
CDK4	1019	-1.36977	1.44e-30	1.9e-28
CDK5RAP1	51654	-1.00005	3.03e-21	7.54e-20
CDKL1	8814	1.1735	1.56e-26	8.87e-25
CDKN1A	1026	1.15368	1.24e-11	7.52e-11
CDKN2A	1029	-1.87767	3.65e-15	3.55e-14
CDKN2B	1030	2.70247	1.42e-30	1.88e-28
CDKN3	1033	-1.08921	7.72e-12	4.86e-11
CDR2L	30850	-1.02061	4.88e-12	3.14e-11
CDT1	81620	-1.50359	8.69e-20	1.72e-18
CEACAM1	634	2.15036	5.55e-18	8.32e-17
CEACAM7	1087	5.28617	2.78e-25	1.29e-23
CEBPB	1051	-1.41894	1.36e-17	1.94e-16
CECR1	51816	1.31995	6.69e-13	4.8e-12
CEL	1056	-2.6279	4.76e-11	2.68e-10
CELSR1	9620	-1.58895	1.96e-21	5.01e-20
CELSR3	1951	-1.16307	2.44e-17	3.34e-16
CENPA	1058	-1.24259	2.01e-17	2.8e-16
CENPF	1063	-1.12408	6.49e-08	2.45e-07
CENPH	64946	-1.0526	1.55e-15	1.59e-14
CENPI	2491	-1.35798	5.13e-16	5.68e-15
CENPN	55839	-1.12293	2.61e-21	6.55e-20
CENPW	387103	-1.06563	9.26e-13	6.57e-12
CEP55	55165	-1.34149	4.64e-14	3.88e-13
CEP72	55722	-1.43059	6.22e-31	9.39e-29
CES1	1066	1.75422	1.04e-07	3.8e-07
CES2	8824	2.19952	2.24e-22	6.71e-21
CES3	23491	2.09887	4.38e-21	1.06e-19
CFB	629	-1.12646	1.05e-07	3.84e-07
CFD	1675	2.63824	5.51e-24	2.1e-22
CFH	3075	1.21667	2.2e-12	1.48e-11
CFL2	1073	1.78362	2.18e-11	1.28e-10
CFP	5199	1.28112	3.49e-13	2.61e-12
CGN	57530	1.15501	2.7e-11	1.56e-10
CGREF1	10669	-2.90966	3.36e-29	3.28e-27
CHAC1	79094	-1.45333	4.72e-17	6.12e-16
CHAD	1101	2.13223	4.12e-17	5.41e-16
CHCHD6	84303	-1.19053	2.25e-22	6.73e-21
CHEK1	1111	-1.01742	8.27e-14	6.72e-13
CHGA	1113	4.87962	4.77e-31	7.43e-29
CHGB	1114	2.06845	1.65e-23	5.87e-22
CHI3L1	1116	-2.88097	4.86e-18	7.33e-17
CHL1	10752	1.3026	6.77e-24	2.53e-22
CHODL	140578	1.00979	1.51e-13	1.19e-12
CHP1	11261	1.28084	7.34e-18	1.08e-16
CHP2	63928	4.09118	6.15e-28	4.54e-26
CHPF	79586	-1.87044	1.7e-30	2.2e-28
CHRDL1	91851	2.64038	1.86e-19	3.52e-18
CHRM2	1129	1.31663	1.24e-09	5.83e-09
CHRNA3	1136	2.04516	1.26e-14	1.13e-13
CHST5	23563	1.92628	8.08e-16	8.64e-15
CHTF18	63922	-1.6099	1.45e-24	5.99e-23
CIDEC	63924	1.74973	2.27e-12	1.53e-11
CILP	8483	2.04537	1.96e-15	1.98e-14
CIPC	85457	1.20786	2.51e-26	1.38e-24
CIRH1A	84916	-1.32224	1.11e-30	1.54e-28
CITED2	10370	1.52072	1.43e-28	1.24e-26
CKAP2	26586	-1.33576	5.03e-15	4.79e-14
CKB	1152	2.0548	3.18e-12	2.09e-11
CKMT1A	548596	1.00633	2.56e-11	1.49e-10
CKMT1B	1159	1.13961	7.12e-11	3.91e-10
CKMT2	1160	-1.17259	2.67e-05	7e-05
CKS1B	1163	-1.11649	5.57e-22	1.57e-20
CKS2	1164	-1.54825	3.1e-20	6.59e-19
CLCA1	1179	3.9669	7.49e-14	6.13e-13
CLCA4	22802	6.05968	1.49e-30	1.95e-28
CLCN2	1181	1.20338	1.72e-12	1.18e-11
CLDN1	9076	-3.71178	1.62e-41	1.76e-38
CLDN11	5010	1.23989	2.79e-14	2.41e-13
CLDN16	10686	-1.12725	3.06e-14	2.63e-13
CLDN2	9075	-3.99852	5.98e-22	1.67e-20
CLDN23	137075	2.67034	4.81e-28	3.6e-26
CLDN5	7122	1.64761	3.79e-18	5.82e-17
CLDN8	9073	3.75565	5.46e-22	1.54e-20
CLEC10A	10462	2.03671	2.44e-23	8.36e-22
CLEC3B	7123	3.71028	1.7e-42	2.08e-39
CLIC2	1193	1.15059	3.98e-14	3.37e-13
CLIC3	9022	-1.14009	5.99e-09	2.56e-08
CLIC5	53405	2.13246	5.71e-18	8.53e-17
CLIP3	25999	1.29808	1.42e-09	6.61e-09
CLIP4	79745	1.50472	6.25e-15	5.88e-14
CLMN	79789	1.11461	1.63e-15	1.67e-14
CLMP	79827	1.58871	1.16e-11	7.06e-11
CLPB	81570	-1.03895	3.12e-23	1.05e-21
CLU	1191	2.43791	9.26e-19	1.57e-17
CMA1	1215	1.76222	1.51e-25	7.36e-24
CMBL	134147	1.75538	1.42e-14	1.27e-13
CMSS1	84319	-1.34881	5.62e-24	2.13e-22
CMTM7	112616	-1.06517	5.17e-12	3.32e-11
CMTM8	152189	-1.25079	1.06e-27	7.43e-26
CNIH3	149111	-1.01875	2.22e-13	1.71e-12
CNN1	1264	3.0019	5.24e-11	2.94e-10
CNN2	1265	-1.25525	1.07e-24	4.48e-23
CNNM4	26504	1.37259	1.13e-19	2.2e-18
CNR1	1268	1.1191	1.03e-14	9.41e-14
CNRIP1	25927	1.29347	7.94e-14	6.48e-13
CNTD2	79935	-2.87167	2.37e-23	8.2e-22
CNTFR	1271	2.71876	1.6e-28	1.37e-26
CNTN1	1272	1.59846	3.86e-21	9.41e-20
CNTN3	5067	1.21035	4.47e-27	2.79e-25
CNTN4	152330	2.22093	1.5e-28	1.31e-26
COL10A1	1300	-2.46659	6.88e-18	1.02e-16
COL11A1	1301	-2.30631	2.3e-21	5.81e-20
COL12A1	1303	-1.65552	5.73e-10	2.8e-09
COL14A1	7373	1.37033	1.32e-08	5.41e-08
COL17A1	1308	1.54443	1.38e-08	5.64e-08
COL1A1	1277	-2.47734	1.36e-15	1.41e-14
COL1A2	1278	-1.40794	5.5e-08	2.09e-07
COL27A1	85301	-1.17586	8.44e-14	6.84e-13
COL28A1	340267	1.16209	2.93e-09	1.3e-08
COL3A1	1281	-1.07905	8.77e-06	2.47e-05
COL4A1	1282	-1.42015	4.06e-09	1.78e-08
COL4A5	1287	1.13173	2.18e-07	7.66e-07
COL5A1	1289	-1.34378	3.75e-09	1.65e-08
COL5A2	1290	-1.40694	1.19e-09	5.62e-09
COL7A1	1294	-2.82918	1.35e-25	6.67e-24
COL8A1	1295	-1.35293	1.65e-07	5.91e-07
COL9A3	1299	-1.44382	1.53e-06	4.79e-06
COLEC12	81035	1.53376	1.54e-16	1.86e-15
COMP	1311	-2.73365	3.93e-17	5.2e-16
COMT	1312	-1.29286	2.98e-16	3.42e-15
COX7A1	1346	1.04805	2.2e-06	6.7e-06
CP	1356	1.91486	4.52e-26	2.41e-24
CPA3	1359	1.58697	2.57e-12	1.72e-11
CPEB2	132864	1.12399	9.46e-15	8.72e-14
CPED1	79974	1.58913	7.06e-13	5.06e-12
CPM	1368	2.78416	1.93e-28	1.6e-26
CPNE1	8904	-1.65134	3.74e-19	6.73e-18
CPNE5	57699	1.51877	1.27e-18	2.1e-17
CPNE7	27132	-3.26978	3.52e-32	6.07e-30
CPNE8	144402	2.11799	8.66e-21	2e-19
CPQ	10404	1.08071	6.8e-11	3.75e-10
CPSF1	29894	-1.05383	1.56e-14	1.39e-13
CPT1A	1374	1.17963	1.72e-19	3.27e-18
CPT2	1376	1.30022	3.59e-24	1.41e-22
CPXM1	56265	-1.59697	9.55e-12	5.9e-11
CPXM2	119587	1.72613	2.46e-09	1.11e-08
CR2	1380	1.58521	2.09e-08	8.41e-08
CRABP1	1381	1.12412	1.53e-13	1.2e-12
CREB3L3	84699	1.61134	1.67e-10	8.75e-10
CROT	54677	1.09066	7.12e-15	6.67e-14
CRYAB	1410	1.97564	5.34e-12	3.42e-11
CRYBA2	1412	1.15237	2.52e-11	1.46e-10
CSE1L	1434	-1.3439	4.6e-20	9.57e-19
CSF3	1440	-1.35403	1.55e-06	4.83e-06
CSNK1E	1454	-1.13412	3.57e-26	1.92e-24
CSRP1	1465	1.49226	1.69e-10	8.87e-10
CST1	1469	-4.3755	7.98e-25	3.41e-23
CST2	1470	-1.72956	1.05e-15	1.11e-14
CTHRC1	115908	-2.95112	1.07e-25	5.37e-24
CTPS1	1503	-1.20718	8.35e-17	1.04e-15
CTSF	8722	1.14071	5.57e-09	2.4e-08
CTSG	1511	2.09769	6.04e-26	3.16e-24
CTSH	1512	-1.02657	1.1e-11	6.76e-11
CTSS	1520	1.11582	2.92e-14	2.52e-13
CTSV	1515	-1.00289	1.78e-07	6.31e-07
CTSW	1521	1.17601	1.85e-10	9.63e-10
CTU1	90353	-1.07274	4.27e-14	3.59e-13
CTU2	348180	-1.1192	7.5e-23	2.38e-21
CWH43	80157	3.40271	2.06e-32	3.67e-30
CXCL1	2919	-2.60252	5.76e-16	6.3e-15
CXCL10	3627	-1.54609	2.44e-06	7.39e-06
CXCL11	6373	-1.81194	3.75e-10	1.88e-09
CXCL12	6387	2.47279	3.42e-23	1.14e-21
CXCL13	10563	1.57893	8.56e-07	2.76e-06
CXCL2	2920	-1.74795	8.27e-11	4.51e-10
CXCL3	2921	-2.50087	9e-16	9.56e-15
CXCL5	6374	-2.17426	9.06e-11	4.91e-10
CXCL9	4283	-1.01201	0.000995346	0.00207534
CYBRD1	79901	2.01945	5.28e-16	5.81e-15
CYP1B1	1545	1.20266	3.23e-05	8.37e-05
CYP27B1	1594	-1.05738	9.63e-25	4.05e-23
CYP2C18	1562	1.22428	1.54e-09	7.11e-09
CYP2S1	29785	-1.3451	1.77e-11	1.05e-10
CYP2W1	54905	-2.21534	2.05e-08	8.23e-08
CYP3A4	1576	1.12153	1.16e-05	3.19e-05
CYP4B1	1580	1.37852	2.12e-11	1.24e-10
CYP4F12	66002	1.27244	2.35e-11	1.37e-10
CYP4F3	4051	-1.04156	7.27e-07	2.37e-06
CYP4X1	260293	-1.18333	3.8e-07	1.29e-06
CYS1	192668	1.26625	4.46e-16	4.98e-15
DAAM2	23500	1.25543	8.26e-19	1.4e-17
DACT3	147906	1.61908	3.21e-12	2.11e-11
DAO	1610	1.9621	2.36e-25	1.11e-23
DARC	2532	1.94427	4.47e-17	5.82e-16
DBNDD1	79007	-1.75978	6.13e-23	1.97e-21
DCAF13	25879	-1.08601	2.01e-16	2.37e-15
DCLK1	9201	1.46433	4.57e-22	1.31e-20
DCN	1634	1.86115	4.52e-13	3.32e-12
DCUN1D5	84259	-1.22384	2.58e-19	4.78e-18
DDIT4	54541	-1.47609	1.21e-18	2.01e-17
DDR2	4921	2.03478	2.1e-12	1.42e-11
DDT	1652	1.01595	1.56e-09	7.22e-09
DDX11	1663	-1.15381	3.9e-18	5.97e-17
DDX21	9188	-1.10663	1.92e-11	1.14e-10
DDX31	64794	-1.10292	3.98e-28	3.07e-26
DDX39A	10212	-1.22142	3.45e-23	1.15e-21
DDX56	54606	-1.09502	1.98e-33	4.75e-31
DDX60	55601	1.35585	4.22e-11	2.39e-10
DEFA5	1670	-1.8172	0.000558218	0.0012075
DEFA6	1671	-1.98123	2.83e-05	7.41e-05
DEFB1	1672	2.24856	9.93e-16	1.05e-14
DENND2A	27147	1.09607	9.08e-18	1.32e-16
DERL3	91319	1.16389	6.39e-07	2.1e-06
DES	1674	3.7505	3.75e-12	2.44e-11
DGAT2	84649	-1.95662	1.12e-20	2.56e-19
DHCR7	1717	-1.49911	1.39e-20	3.1e-19
DHRS2	10202	-1.39506	6.61e-10	3.21e-09
DHRS7C	201140	1.17295	1.23e-23	4.46e-22
DHRS9	10170	3.70808	4.73e-28	3.56e-26
DHX34	9704	-1.22523	3.25e-26	1.76e-24
DIAPH3	81624	-1.12499	3.6e-16	4.08e-15
DISP2	85455	1.41702	5.94e-20	1.21e-18
DIXDC1	85458	1.25148	1.52e-09	7.04e-09
DKC1	1736	-1.53427	4.33e-28	3.31e-26
DKK4	27121	-1.57194	3.34e-08	1.31e-07
DMD	1756	2.13967	2.32e-12	1.56e-11
DMKN	93099	-1.25563	1.4e-06	4.4e-06
DNAJB4	11080	1.04725	7.98e-11	4.36e-10
DNAJB5	25822	1.39337	7.03e-09	2.98e-08
DNASE1L3	1776	2.79161	4.61e-24	1.78e-22
DNMT1	1786	-1.1055	6.86e-18	1.01e-16
DNTTIP1	116092	-1.20341	3.64e-19	6.57e-18
DOCK6	57572	-1.08972	4.73e-17	6.13e-16
DOK7	285489	-1.38858	2.98e-11	1.71e-10
DPCD	25911	-1.08352	4.5e-18	6.82e-17
DPEP1	1800	-5.68422	1.7e-21	4.4e-20
DPF3	8110	2.04484	1.99e-35	7.11e-33
DPH2	1802	-1.05013	2.04e-22	6.14e-21
DPH7	92715	-1.01769	1.99e-24	8.05e-23
DPP10	57628	2.10088	4.14e-15	4.01e-14
DPP6	1804	1.43198	1.73e-11	1.03e-10
DPP7	29952	-1.11335	2.11e-18	3.37e-17
DPT	1805	3.42788	1.33e-21	3.51e-20
DPYD	1806	1.3471	6.27e-19	1.09e-17
DPYSL5	56896	1.02554	1.22e-10	6.52e-10
DSC2	1824	1.66117	1.42e-19	2.74e-18
DSCC1	79075	-1.38919	2.46e-20	5.29e-19
DSG3	1830	-1.05425	5.2e-06	1.51e-05
DST	667	1.06885	7.12e-12	4.49e-11
DTD1	92675	-1.02425	4.54e-15	4.36e-14
DTL	51514	-1.01684	2.3e-13	1.77e-12
DTNA	1837	1.31199	9.63e-08	3.54e-07
DTYMK	1841	-1.03776	3.57e-19	6.46e-18
DUOXA2	405753	-1.42363	7.8e-05	0.000190812
DUS3L	56931	-1.21728	2.14e-21	5.41e-20
DUSP1	1843	1.12255	8.93e-09	3.74e-08
DUSP2	1844	-1.21293	2.11e-11	1.24e-10
DUSP27	92235	-1.99041	4.59e-08	1.76e-07
DUSP4	1846	-1.93916	1.58e-12	1.09e-11
E2F1	1869	-1.71073	1.81e-28	1.52e-26
E2F5	1875	-1.13231	9.96e-15	9.15e-14
EAF2	55840	1.01204	1.93e-12	1.31e-11
EBPL	84650	-1.01857	1.42e-19	2.74e-18
ECE2	9718	-1.33438	1.61e-24	6.55e-23
ECI2	10455	1.41927	1.65e-22	5.03e-21
ECT2	1894	-1.4733	3.53e-15	3.45e-14
EDAR	10913	-1.34673	3.1e-08	1.22e-07
EDIL3	10085	2.00355	4.66e-25	2.08e-23
EDN2	1907	1.38711	4.25e-10	2.11e-09
EDN3	1908	3.02542	2.43e-32	4.3e-30
EDNRA	1909	-1.21813	9.12e-11	4.95e-10
EEF1A2	1917	1.16416	5.17e-11	2.9e-10
EFEMP1	2202	1.2006	1.48e-08	6.03e-08
EFHC2	80258	1.17969	1.14e-30	1.55e-28
EFNA3	1944	-1.38361	9.05e-16	9.61e-15
EGFL6	25975	-1.23877	2.32e-18	3.69e-17
EHHADH	1962	1.07342	1.23e-14	1.11e-13
EIF3B	8662	-1.20639	4.49e-28	3.4e-26
EIF4E3	317649	1.52284	2.27e-26	1.26e-24
EIF4EBP1	1978	-1.37373	7.75e-23	2.45e-21
EME1	146956	-1.015	7.2e-25	3.11e-23
EME2	197342	-1.02361	1.24e-12	8.64e-12
EML1	2009	1.63258	2.88e-10	1.47e-09
EMP1	2012	1.75363	1.16e-15	1.22e-14
ENC1	8507	-1.75991	1.15e-30	1.56e-28
ENDOD1	23052	1.61043	1.07e-26	6.28e-25
ENGASE	64772	-1.39283	6.86e-12	4.34e-11
ENHO	375704	1.38613	2.29e-28	1.87e-26
ENOPH1	58478	-1.00129	1.51e-25	7.35e-24
ENPP1	5167	1.53863	1.27e-13	1e-12
ENPP2	5168	1.33331	4.42e-18	6.71e-17
ENPP3	5169	1.12142	5.4e-05	0.000135504
ENTPD3	956	1.07796	5.25e-17	6.76e-16
ENTPD5	957	2.57062	1.55e-29	1.67e-27
ENTPD8	377841	2.10866	1.02e-14	9.38e-14
EPAS1	2034	1.0502	3e-16	3.43e-15
EPB41L3	23136	2.4767	5.64e-33	1.17e-30
EPB41L4A	64097	1.28281	1.5e-21	3.93e-20
EPB41L4B	54566	1.3226	6.69e-17	8.47e-16
EPHA1	2041	-1.13973	4.22e-16	4.73e-15
EPHA10	284656	1.02167	5.35e-12	3.43e-11
EPHA4	2043	1.00954	5.54e-09	2.38e-08
EPHA7	2045	1.53917	3.95e-12	2.56e-11
EPHB3	2049	-1.75896	3.53e-13	2.64e-12
EPHB4	2050	-1.40607	9.84e-28	6.93e-26
EPHX2	2053	1.41347	8.22e-19	1.4e-17
EPHX4	253152	-2.35224	1.74e-27	1.17e-25
EPM2A	7957	1.12674	2.69e-09	1.2e-08
EREG	2069	-1.49701	3.26e-06	9.72e-06
ERP27	121506	-1.0795	9.56e-07	3.07e-06
ERVMER34-1	100288413	-1.17577	8.63e-08	3.19e-07
ESM1	11082	-2.07939	2.49e-34	7.1e-32
ESPL1	9700	-1.22894	3.32e-14	2.84e-13
ESR1	2099	1.26088	3.74e-11	2.13e-10
ETFDH	2110	1.95414	1.29e-31	2.17e-29
ETHE1	23474	1.46102	4.57e-18	6.91e-17
ETV4	2118	-4.48374	1.5e-49	5.87e-46
ETV7	51513	-1.01746	3.32e-08	1.3e-07
EVA1A	84141	-2.62655	2.95e-23	9.97e-22
EVI2A	2123	1.19195	1.18e-10	6.33e-10
EVI2B	2124	1.34709	5.93e-13	4.3e-12
EVPL	2125	-1.61791	1.08e-14	9.84e-14
EVX1	2128	-1.08469	2.43e-07	8.48e-07
EXO1	9156	-1.45898	1.55e-15	1.59e-14
EXOSC2	23404	-1.20312	7.6e-30	8.68e-28
EXOSC4	54512	-1.3342	3.26e-20	6.92e-19
EXOSC5	56915	-1.51698	6.07e-33	1.24e-30
EXOSC7	23016	-1.12981	2.78e-28	2.21e-26
EYA2	2139	2.0196	3.52e-18	5.43e-17
EZH2	2146	-1.23198	4.8e-21	1.16e-19
F12	2161	-1.56314	7.79e-19	1.33e-17
F13A1	2162	2.12987	1.14e-16	1.4e-15
F2R	2149	-1.02434	3.24e-12	2.13e-11
F2RL1	2150	1.2523	1.08e-14	9.85e-14
FABP1	2168	3.89509	3.91e-20	8.2e-19
FABP2	2169	2.9197	8.71e-23	2.75e-21
FABP4	2167	2.33828	7.53e-11	4.13e-10
FABP6	2172	-3.0347	4.98e-15	4.75e-14
FADS2	9415	-1.32042	2.1e-07	7.4e-07
FAIM3	9214	1.09377	1.73e-08	7.02e-08
FAM107A	11170	2.39519	1.2e-32	2.27e-30
FAM107B	83641	1.39431	2.54e-15	2.53e-14
FAM110B	90362	1.06055	9.26e-08	3.41e-07
FAM129A	116496	2.75675	9.52e-19	1.61e-17
FAM132A	388581	1.65943	1.74e-14	1.54e-13
FAM132B	151176	-1.25056	1.1e-12	7.69e-12
FAM134B	54463	1.45681	9.76e-14	7.83e-13
FAM150A	389658	-1.13271	1.33e-15	1.37e-14
FAM151A	338094	1.00516	1.82e-12	1.24e-11
FAM161B	145483	1.15083	2.75e-21	6.89e-20
FAM162A	26355	1.16334	4.03e-21	9.81e-20
FAM163B	642968	1.24536	3.88e-13	2.88e-12
FAM177B	400823	1.3365	1.35e-07	4.88e-07
FAM189A1	23359	1.45991	8.85e-19	1.5e-17
FAM189A2	9413	1.14738	7.42e-22	2.04e-20
FAM203A	51236	-1.18259	2.02e-24	8.15e-23
FAM211A	388341	1.09491	2.92e-16	3.36e-15
FAM214A	56204	1.16326	1.18e-15	1.23e-14
FAM222A	84915	-1.07575	2.77e-11	1.6e-10
FAM227A	646851	-1.58686	7.85e-22	2.14e-20
FAM3B	54097	-1.30726	0.000666874	0.00142387
FAM3D	131177	1.48944	1.42e-10	7.5e-10
FAM46A	55603	1.19361	1.72e-12	1.18e-11
FAM46B	115572	1.21673	6.64e-08	2.5e-07
FAM46C	54855	1.77166	6.28e-19	1.09e-17
FAM47E-STBD1	100631383	1.18363	1.45e-26	8.24e-25
FAM57A	79850	-1.39497	3.19e-18	4.97e-17
FAM65B	9750	1.19443	1.39e-07	4.99e-07
FAM71E1	112703	-1.05081	1.04e-18	1.75e-17
FAM83H	286077	-1.09072	6.8e-13	4.88e-12
FAM89A	375061	-1.54237	4.39e-27	2.75e-25
FAM92A1	137392	-1.00104	9.35e-07	3.01e-06
FANCA	2175	-1.1952	4.22e-22	1.21e-20
FANCI	55215	-1.23733	8.03e-15	7.46e-14
FAP	2191	-2.45355	8.36e-16	8.92e-15
FAS	355	1.25328	3.32e-13	2.5e-12
FASN	2194	-1.55696	1.65e-15	1.68e-14
FAXDC2	10826	1.32871	1.79e-10	9.33e-10
FBL	2091	-1.24064	2.24e-23	7.78e-22
FBLIM1	54751	1.09094	9.88e-26	5e-24
FBLN1	2192	1.58949	4.05e-10	2.02e-09
FBLN2	2199	1.20186	5.4e-07	1.79e-06
FBXL22	283807	1.20025	5e-09	2.16e-08
FBXL6	26233	-1.13083	1.87e-14	1.65e-13
FBXO27	126433	1.23922	3.13e-09	1.38e-08
FBXO32	114907	1.71331	1.87e-13	1.46e-12
FBXO41	150726	-1.21408	6.78e-21	1.59e-19
FCER1A	2205	1.44794	3.5e-19	6.34e-18
FCER2	2208	1.11912	6.07e-10	2.96e-09
FCGR3A	2214	-1.12802	6.46e-06	1.85e-05
FCHO1	23149	-1.24687	2.82e-14	2.43e-13
FCRL3	115352	1.42767	2.36e-07	8.24e-07
FCRL5	83416	1.11617	1.63e-08	6.61e-08
FCRLA	84824	1.22868	4.92e-11	2.76e-10
FDCSP	260436	2.0098	7.11e-08	2.66e-07
FEN1	2237	-1.01108	2.8e-17	3.8e-16
FER1L6	654463	1.60871	2.53e-14	2.2e-13
FERMT1	55612	-1.25679	1.57e-11	9.36e-11
FERMT2	10979	1.20064	1.5e-06	4.68e-06
FEV	54738	1.25639	2.53e-27	1.67e-25
FEZ1	9638	1.24793	2.36e-10	1.21e-09
FEZ2	9637	1.02034	1.83e-14	1.62e-13
FFAR4	338557	1.12796	2.47e-05	6.5e-05
FGFBP1	9982	1.28707	1.58e-06	4.92e-06
FGFR2	2263	2.05652	8.15e-20	1.62e-18
FGFR4	2264	-1.24817	1.25e-11	7.59e-11
FGFRL1	53834	-2.26963	1.19e-17	1.72e-16
FGGY	55277	-1.36759	2.15e-08	8.63e-08
FGL2	10875	2.43856	2.08e-30	2.64e-28
FHL1	2273	2.85318	1.22e-20	2.75e-19
FIBCD1	84929	-1.0378	0.000380738	0.000845086
FIGF	2277	1.50581	2.06e-20	4.46e-19
FIGN	55137	1.13472	5.08e-14	4.23e-13
FJX1	24147	-2.01602	2.62e-31	4.26e-29
FKBP10	60681	-1.94976	2.85e-17	3.86e-16
FKBP1B	2281	1.18222	2.75e-14	2.38e-13
FLNA	2316	1.21498	5.3e-05	0.000133017
FLNC	2318	1.91069	5.28e-08	2.01e-07
FLVCR2	55640	1.44321	3.31e-19	6.03e-18
FMN2	56776	2.22533	3.24e-18	5.04e-17
FMO4	2329	1.5892	2.21e-23	7.69e-22
FMO5	2330	1.98815	1.74e-22	5.28e-21
FNBP1	23048	1.59618	2.69e-18	4.24e-17
FNIP2	57600	1.06977	7.18e-16	7.74e-15
FOLR1	2348	-1.09913	4.51e-08	1.73e-07
FOLR2	2350	1.74023	1.35e-14	1.21e-13
FOSB	2354	1.12586	0.00236645	0.00463866
FOSL1	8061	-2.18869	1.44e-14	1.29e-13
FOXA1	3169	1.18598	4.13e-08	1.6e-07
FOXA2	3170	-1.64304	1.23e-15	1.28e-14
FOXD1	2297	-1.48529	2.88e-07	9.94e-07
FOXD2	2306	1.08658	2.37e-12	1.59e-11
FOXF1	2294	1.10924	1.08e-09	5.08e-09
FOXF2	2295	1.72864	1.69e-18	2.75e-17
FOXM1	2305	-1.33704	9.91e-17	1.23e-15
FOXN3	1112	1.3079	2.84e-16	3.28e-15
FOXP2	93986	1.70281	6.1e-14	5.04e-13
FOXP4	116113	-1.09273	1.53e-20	3.37e-19
FOXQ1	94234	-4.03468	5.64e-36	2.26e-33
FPGS	2356	-1.13161	3.02e-23	1.02e-21
FRG1B	284802	1.10003	7.75e-06	2.19e-05
FRMD1	79981	1.35076	1.82e-09	8.34e-09
FRMD3	257019	2.16188	7.54e-19	1.29e-17
FSCN1	6624	-1.39473	3.03e-11	1.74e-10
FSTL3	10272	-1.25574	5.49e-11	3.07e-10
FTSJ1	24140	-1.28539	7.15e-30	8.31e-28
FUCA1	2517	1.66198	9.34e-28	6.6e-26
FUT1	2523	-1.37145	4.33e-28	3.31e-26
FXYD1	5348	1.94659	4.91e-30	5.87e-28
FXYD3	5349	1.55333	7.03e-16	7.59e-15
FXYD5	53827	-2.09028	2.16e-40	1.84e-37
FXYD6	53826	1.93315	5.49e-12	3.51e-11
GAB1	2549	1.04403	4.16e-18	6.33e-17
GABARAP	11337	1.43012	8.01e-12	5.02e-11
GABRE	2564	-1.87102	4.28e-14	3.59e-13
GABRP	2568	-1.19142	8.48e-06	2.39e-05
GAD1	2571	-2.20232	6.25e-18	9.32e-17
GALK1	2584	-1.45752	2.3e-20	4.95e-19
GALNT12	79695	1.29121	1.27e-15	1.32e-14
GALNT15	117248	1.00843	3.94e-11	2.24e-10
GALNT16	57452	2.04615	3.58e-18	5.52e-17
GALNT6	11226	-1.73713	7.31e-20	1.46e-18
GAP43	2596	1.72238	8.36e-21	1.93e-19
GAPT	202309	1.08066	8.24e-10	3.97e-09
GAREM	64762	1.00163	1.05e-10	5.64e-10
GARS	2617	-1.1361	2.77e-20	5.94e-19
GAS2	2620	-1.02588	1.12e-09	5.29e-09
GAS7	8522	1.18044	2.32e-12	1.56e-11
GBP3	2635	1.2077	6.95e-07	2.27e-06
GCG	2641	4.1885	4.4e-29	4.2e-27
GCNT2	2651	3.18704	3.79e-45	5.73e-42
GCNT3	9245	2.91664	2.45e-16	2.86e-15
GCNT4	51301	1.01093	3.91e-14	3.31e-13
GDF15	9518	-3.03602	1.91e-21	4.92e-20
GDPD2	54857	2.38901	3.71e-28	2.89e-26
GDPD3	79153	2.04707	1.85e-20	4.04e-19
GDPD5	81544	-1.93015	3.16e-21	7.83e-20
GFRA1	2674	2.25382	4.34e-22	1.25e-20
GFRA2	2675	1.25213	1.67e-35	6.06e-33
GFRA3	2676	1.47009	6.39e-17	8.11e-16
GGT6	124975	2.02086	2.87e-16	3.31e-15
GHR	2690	1.51908	1.07e-20	2.46e-19
GIMAP4	55303	1.18717	4.02e-12	2.61e-11
GIMAP5	55340	1.10592	4.82e-14	4.02e-13
GIMAP6	474344	1.08894	1.1e-14	1e-13
GIMAP7	168537	1.45938	2.31e-17	3.18e-16
GIMAP8	155038	1.08066	4.42e-17	5.77e-16
GINM1	116254	1.05566	2.16e-14	1.9e-13
GINS1	9837	-1.48448	4.75e-19	8.41e-18
GINS2	51659	-1.01881	4.28e-16	4.79e-15
GINS4	84296	-1.12409	4.37e-13	3.22e-12
GIPC2	54810	1.17423	5.15e-07	1.71e-06
GJB3	2707	-1.18769	4.86e-06	1.42e-05
GJB4	127534	-1.13664	5.26e-13	3.84e-12
GJB5	2709	-1.16468	2.89e-06	8.7e-06
GLA	2717	-1.05151	7.53e-16	8.09e-15
GLDN	342035	1.1776	6.66e-10	3.23e-09
GLIPR2	152007	1.84593	2.08e-22	6.24e-21
GLOD5	392465	1.12146	6.15e-15	5.79e-14
GLP2R	9340	2.47307	9.21e-47	2.01e-43
GLTP	51228	1.43318	4.15e-39	3.13e-36
GLYATL1	92292	-1.3431	9.21e-10	4.39e-09
GNA11	2767	1.43596	2.86e-25	1.32e-23
GNA13	10672	1.00791	1.56e-15	1.6e-14
GNAI1	2770	1.49177	7.84e-16	8.4e-15
GNAO1	2775	2.21674	2.75e-17	3.73e-16
GNE	10020	1.01698	1.32e-06	4.16e-06
GNG12	55970	1.18391	1.41e-13	1.11e-12
GNG2	54331	1.98204	1.51e-19	2.91e-18
GNG4	2786	-1.43383	5.22e-05	0.000131259
GNG7	2788	1.62917	2.04e-36	9.78e-34
GNG8	94235	1.18588	1.17e-17	1.68e-16
GNL3	26354	-1.03649	2.57e-14	2.23e-13
GOLGA7B	401647	-1.53363	1.88e-16	2.23e-15
GOLM1	51280	1.47485	6.57e-19	1.14e-17
GOLT1A	127845	-1.15116	1.45e-09	6.73e-09
GPA33	10223	1.84834	4.03e-17	5.31e-16
GPD1L	23171	1.44179	1.33e-27	9.15e-26
GPER1	2852	1.69071	5.07e-17	6.54e-16
GPM6A	2823	2.14905	2.17e-15	2.18e-14
GPM6B	2824	1.7534	4.08e-17	5.36e-16
GPR128	84873	1.42524	5.08e-10	2.5e-09
GPR143	4935	-1.43086	6.5e-10	3.16e-09
GPR15	2838	2.5511	8.35e-29	7.59e-27
GPR157	80045	-1.03503	7.44e-15	6.94e-14
GPR183	1880	1.02107	1.84e-07	6.52e-07
GPR34	2857	1.16751	3.3e-12	2.17e-11
GPR56	9289	-1.44571	1.27e-18	2.1e-17
GPR98	84059	1.16496	2.93e-11	1.69e-10
GPRIN2	9721	1.1526	4.72e-11	2.66e-10
GPT	2875	2.98494	7.16e-25	3.1e-23
GPT2	84706	-1.61528	4.24e-23	1.39e-21
GPX2	2877	-1.1466	9.09e-12	5.64e-11
GPX3	2878	2.15186	2.17e-17	3e-16
GRAMD1A	57655	-1.57643	9.28e-28	6.58e-26
GRAMD1C	54762	1.13849	9.98e-11	5.39e-10
GRAMD3	65983	1.50056	5.07e-24	1.95e-22
GRB7	2886	-1.78675	1.63e-17	2.3e-16
GREM2	64388	2.86519	4.6e-35	1.48e-32
GRHL1	29841	-1.71424	5.76e-19	1.01e-17
GRHL3	57822	-1.41285	2.63e-18	4.15e-17
GRIA3	2892	1.04082	1.53e-23	5.47e-22
GRIA4	2893	1.77434	3.08e-22	9.13e-21
GRIK5	2901	1.32221	1.16e-12	8.1e-12
GRIN2D	2906	-3.06204	3.4e-41	3.51e-38
GRINA	2907	-1.44603	9.36e-25	3.95e-23
GSDMA	284110	-1.05238	3.36e-10	1.7e-09
GSN	2934	1.7537	6.62e-25	2.88e-23
GSTA1	2938	1.97718	8.3e-10	3.99e-09
GSTM2	2946	1.14656	6.08e-16	6.62e-15
GSTM3	2947	1.03863	4.33e-05	0.000110305
GSTM5	2949	1.89531	2.41e-28	1.94e-26
GSTP1	2950	-1.1634	2.66e-17	3.62e-16
GTF2IRD1	9569	-2.05354	1.25e-32	2.34e-30
GTF3A	2971	-1.59211	1.52e-23	5.44e-22
GTPBP3	84705	-1.12205	1.38e-25	6.76e-24
GTPBP4	23560	-1.08234	2.45e-25	1.14e-23
GTSE1	51512	-1.18475	1.32e-18	2.18e-17
GUCA2A	2980	5.76582	1.66e-33	4.02e-31
GUCA2B	2981	5.7962	2.27e-38	1.48e-35
GYLTL1B	120071	-3.3287	4.56e-28	3.45e-26
GYPC	2995	1.39628	6e-13	4.34e-12
GZMA	3001	1.36725	1.97e-08	7.94e-08
GZMB	3002	-1.66184	1.48e-10	7.82e-10
HAGHL	84264	-2.29971	4.74e-29	4.47e-27
HAND1	9421	1.90325	6.83e-09	2.9e-08
HAND2	9464	3.01545	1.85e-15	1.88e-14
HAPLN1	1404	1.27502	8.96e-22	2.43e-20
HAPLN3	145864	-1.54913	1.54e-16	1.85e-15
HAUS5	23354	-1.13352	6.45e-28	4.74e-26
HBA2	3040	1.9146	1.74e-10	9.1e-10
HBB	3043	2.65146	2.89e-16	3.33e-15
HDAC9	9734	1.62601	1.92e-25	9.16e-24
HDGFRP3	50810	1.17995	6.12e-06	1.76e-05
HEATR2	54919	-1.14447	1.99e-28	1.64e-26
HELLS	3070	-1.28125	3.84e-13	2.86e-12
HELZ2	85441	-1.12999	7.12e-14	5.85e-13
HEPACAM2	253012	2.42375	4.71e-12	3.04e-11
HERC3	8916	1.07563	9.6e-14	7.72e-13
HES4	57801	-1.33671	6.6e-10	3.21e-09
HES6	55502	-1.72296	1.58e-19	3.02e-18
HGD	3081	1.16431	6.79e-11	3.74e-10
HHLA2	11148	3.4075	6.02e-26	3.16e-24
HIF3A	64344	1.98137	1.15e-11	7e-11
HIGD1A	25994	1.97922	1.24e-20	2.8e-19
HILPDA	29923	-2.15734	2.23e-29	2.3e-27
HIST1H1C	3006	1.97897	2.18e-18	3.47e-17
HIST3H2A	92815	-1.84916	6.08e-20	1.24e-18
HJURP	55355	-1.62962	6.42e-23	2.06e-21
HKDC1	80201	-1.12626	2.39e-07	8.34e-07
HLF	3131	1.19819	9.96e-13	7.03e-12
HM13	81502	-1.26132	6.65e-26	3.48e-24
HMCN2	256158	2.03138	5.91e-16	6.45e-15
HMGA1	3159	-1.3989	7.86e-25	3.36e-23
HMGCS2	3158	3.25723	8.66e-16	9.23e-15
HMMR	3161	-1.06778	8.87e-07	2.86e-06
HMOX1	3162	1.49841	1.95e-13	1.51e-12
HOXB8	3218	-2.25863	8.62e-11	4.69e-10
HOXD10	3236	1.01639	9.67e-05	0.000233518
HPGD	3248	3.23875	2.6e-29	2.64e-27
HPGDS	27306	1.76417	6.67e-33	1.35e-30
HPSE2	60495	1.61612	4.94e-38	2.94e-35
HRASLS2	54979	2.34089	6.29e-20	1.27e-18
HRCT1	646962	2.16195	5.27e-16	5.81e-15
HS6ST2	90161	-1.50101	4.04e-10	2.02e-09
HSD11B2	3291	2.222	4.93e-26	2.6e-24
HSD17B11	51170	1.34484	5.59e-16	6.14e-15
HSD17B2	3294	3.51176	7.37e-23	2.34e-21
HSD3B2	3284	2.89208	2.2e-13	1.69e-12
HSF4	3299	-1.84215	1.25e-20	2.81e-19
HSP90AB1	3326	-1.09112	5.44e-23	1.76e-21
HSPA2	3306	1.46118	2.45e-09	1.1e-08
HSPB3	8988	1.36332	1.78e-11	1.06e-10
HSPB6	126393	2.87771	3.19e-15	3.13e-14
HSPB7	27129	1.77239	5.59e-08	2.12e-07
HSPB8	26353	2.60814	7.62e-13	5.46e-12
HSPD1	3329	-1.17425	1.57e-15	1.61e-14
HSPH1	10808	-1.2577	4.04e-09	1.77e-08
HTR1D	3352	-1.84122	4.04e-17	5.32e-16
HTR4	3360	1.84593	7.88e-30	8.94e-28
HTRA3	94031	-1.03286	7.92e-06	2.24e-05
HYAL2	8692	-1.03499	4.89e-17	6.33e-16
IARS	3376	-1.13838	1.16e-20	2.64e-19
IER5L	389792	-1.42987	2.49e-21	6.26e-20
IFI6	2537	-1.32059	2.75e-08	1.09e-07
IFIT1	3434	1.1069	1.66e-06	5.16e-06
IFITM1	8519	-1.95193	1.43e-20	3.18e-19
IFITM2	10581	-1.5891	6.76e-12	4.28e-11
IFITM3	10410	-1.75537	5.55e-19	9.72e-18
IFRD2	7866	-1.29156	1.13e-26	6.58e-25
IGF2	3481	-1.43602	0.00389016	0.00734603
IGFBP6	3489	2.02287	3.1e-20	6.59e-19
IGFL2	147920	-1.18128	4.22e-07	1.42e-06
IGFL4	444882	-1.93092	2.91e-20	6.22e-19
IGJ	3512	4.48512	6.28e-21	1.48e-19
IGLL5	100423062	2.63784	5.39e-13	3.93e-12
IGSF10	285313	2.27806	1.84e-15	1.87e-14
IGSF3	3321	1.02532	7.99e-14	6.51e-13
IGSF9	57549	1.26685	1.9e-12	1.29e-11
IKZF1	10320	1.43186	1.43e-12	9.88e-12
IKZF3	22806	1.11532	5.48e-08	2.08e-07
IL10RA	3587	1.09584	8.59e-12	5.35e-11
IL11	3589	-1.53136	2.49e-13	1.9e-12
IL16	3603	1.61816	1.11e-16	1.36e-15
IL18	3606	1.08218	5.7e-09	2.45e-08
IL1B	3553	-1.23292	3.86e-05	9.91e-05
IL1R1	3554	1.02307	9.76e-08	3.58e-07
IL1R2	7850	2.13921	1.59e-14	1.41e-13
IL1RN	3557	-1.62509	1.45e-08	5.94e-08
IL20RA	53832	-1.14579	6.54e-13	4.71e-12
IL23A	51561	-1.36846	5.53e-16	6.08e-15
IL6R	3570	2.26521	2.75e-36	1.22e-33
IL6ST	3572	1.14802	3.19e-13	2.4e-12
IL8	3576	-3.20513	3.39e-14	2.89e-13
IMPA1	3612	1.12674	4.39e-12	2.84e-11
IMPDH1	3614	-1.56058	6.55e-25	2.86e-23
INHBA	3624	-2.59393	3.68e-29	3.56e-27
INHBB	3625	-1.102	8.36e-08	3.1e-07
INPP5D	3635	-1.1644	6.35e-11	3.51e-10
INSL5	10022	3.16585	1.03e-11	6.34e-11
IPO5	3843	-1.04151	3.39e-17	4.54e-16
IQGAP2	10788	1.86645	3.4e-18	5.27e-17
IQGAP3	128239	-1.80741	1.72e-24	6.99e-23
IRAK1	3654	-1.16966	6.91e-20	1.38e-18
IRAK2	3656	-1.11949	4.66e-14	3.89e-13
IRF4	3662	1.47237	9.52e-16	1.01e-14
ISX	91464	2.14587	1.38e-16	1.68e-15
ITGA11	22801	-1.37413	9.71e-12	5.99e-11
ITGA2	3673	-1.17896	2.91e-12	1.93e-11
ITGA7	3679	1.14465	2.74e-07	9.47e-07
ITGA8	8516	1.051	1.14e-24	4.76e-23
ITGAX	3687	-1.08443	4.4e-07	1.48e-06
ITGBL1	9358	-1.20783	1.26e-09	5.89e-09
ITIH5	80760	1.39085	8.03e-12	5.03e-11
ITLN1	55600	3.21118	2.57e-11	1.49e-10
ITM2A	9452	1.98062	3.93e-19	7.05e-18
ITM2C	81618	2.30335	2.07e-26	1.16e-24
ITPKA	3706	1.32837	1.68e-09	7.71e-09
ITPR1	3708	1.2895	3.98e-11	2.26e-10
JADE3	9767	-1.20176	2.9e-15	2.86e-14
JAG2	3714	-1.56316	2.19e-19	4.11e-18
JAM2	58494	2.19278	7.66e-26	3.97e-24
JAM3	83700	1.06955	2.45e-09	1.1e-08
JAZF1	221895	1.2236	5.57e-11	3.11e-10
JPH1	56704	-1.44009	7.72e-21	1.8e-19
JPH2	57158	1.76234	8.63e-11	4.69e-10
KAL1	3730	-1.13751	2.25e-14	1.97e-13
KANK2	25959	1.28406	1.34e-09	6.23e-09
KAT2A	2648	-1.4833	3.12e-34	8.43e-32
KAT2B	8850	1.4866	3.08e-26	1.68e-24
KCNAB1	7881	1.47568	1.03e-14	9.4e-14
KCNG1	3755	1.09714	1.14e-13	9.04e-13
KCNIP4	80333	1.25128	2.03e-14	1.79e-13
KCNMA1	3778	2.02629	7.89e-16	8.45e-15
KCNMB1	3779	1.84301	4.78e-11	2.69e-10
KCNN4	3783	-1.34286	8.82e-09	3.7e-08
KCTD12	115207	1.54601	5.38e-13	3.93e-12
KCTD14	65987	-1.13257	2.4e-18	3.8e-17
KCTD9	54793	1.30573	1.41e-17	2e-16
KIAA0020	9933	-1.11632	1.02e-18	1.71e-17
KIAA0125	9834	1.08274	5.08e-11	2.85e-10
KIAA0226L	80183	-1.10752	5.31e-05	0.00013326
KIAA0513	9764	1.55453	1.26e-27	8.73e-26
KIAA0895L	653319	-1.02973	7.91e-13	5.65e-12
KIAA1161	57462	1.07904	2.95e-16	3.38e-15
KIAA1199	57214	-3.97025	6.15e-41	5.51e-38
KIAA1211	57482	1.65901	2.82e-20	6.04e-19
KIAA1257	57501	-1.61076	1.27e-29	1.4e-27
KIAA1549	57670	-1.35105	4.83e-31	7.46e-29
KIAA1644	85352	1.2801	3.98e-11	2.26e-10
KIAA1683	80726	1.03591	1.27e-15	1.32e-14
KIF12	113220	-1.46922	4.24e-10	2.11e-09
KIF13B	23303	1.10721	5.54e-13	4.03e-12
KIF18B	146909	-1.4692	6.08e-25	2.67e-23
KIF1A	547	1.27207	1.19e-18	1.97e-17
KIF20A	10112	-1.58657	1.42e-18	2.32e-17
KIF23	9493	-1.15922	3.85e-16	4.36e-15
KIF26B	55083	-1.16962	2.97e-14	2.56e-13
KIF2C	11004	-1.38601	1.3e-19	2.52e-18
KIF4A	24137	-1.24886	3.83e-17	5.08e-16
KIFC1	3833	-1.23751	2.64e-19	4.87e-18
KIFC2	90990	-1.17655	2.63e-16	3.05e-15
KIFC3	3801	-1.07818	7.49e-12	4.72e-11
KIT	3815	1.73579	2.68e-21	6.71e-20
KITLG	4254	1.165	5.34e-11	2.98e-10
KLF4	9314	2.41184	3.43e-26	1.85e-24
KLF9	687	1.77616	3.77e-20	7.93e-19
KLHL17	339451	-1.26275	5.75e-23	1.85e-21
KLHL35	283212	-1.91713	2.24e-19	4.19e-18
KLK1	3816	1.3852	2.87e-08	1.14e-07
KLK10	5655	-2.81936	5.76e-16	6.31e-15
KLK11	11012	-1.88038	4.83e-09	2.09e-08
KLK12	43849	-1.32209	5.71e-08	2.17e-07
KLK15	55554	1.14603	2.75e-10	1.41e-09
KLK6	5653	-2.7759	3.11e-15	3.06e-14
KLK7	5650	-1.30248	4.8e-08	1.84e-07
KLK8	11202	-1.31499	1.57e-09	7.25e-09
KLRB1	3820	1.58154	1.29e-20	2.88e-19
KPNA2	3838	-1.26546	1.21e-18	2.01e-17
KRBA1	84626	1.03038	7.85e-09	3.31e-08
KRCC1	51315	1.1796	1.01e-10	5.46e-10
KRT17	3872	-2.6465	6.15e-17	7.83e-16
KRT20	54474	3.26109	5.22e-21	1.25e-19
KRT23	25984	-3.8536	2.26e-19	4.22e-18
KRT24	192666	1.63239	9.08e-20	1.79e-18
KRT6B	3854	-1.76948	3.05e-11	1.75e-10
KRT7	3855	-2.46486	1.53e-21	4e-20
KRT80	144501	-3.53567	6.24e-46	1.11e-42
KRTAP13-2	337959	1.72646	6.63e-12	4.21e-11
KTN1	3895	1.01169	2.71e-09	1.21e-08
L1CAM	3897	1.72728	1.27e-12	8.84e-12
L3MBTL1	26013	-1.09158	7.48e-08	2.79e-07
LAGE3	8270	-1.0865	1.26e-17	1.81e-16
LAMA1	284217	1.11146	1.39e-15	1.43e-14
LAPTM4B	55353	-1.11492	7.67e-12	4.83e-11
LAS1L	81887	-1.13023	1.02e-21	2.74e-20
LCN12	286256	-1.66836	3.91e-13	2.9e-12
LCN2	3934	-1.57161	1.3e-05	3.56e-05
LDB3	11155	2.42964	5.18e-15	4.94e-14
LDHD	197257	2.85091	2.95e-29	2.97e-27
LDLRAD3	143458	-1.41312	6.16e-15	5.8e-14
LEF1	51176	-1.5433	5.79e-18	8.64e-17
LEMD1	93273	-2.34523	6.6e-23	2.11e-21
LEPR	3953	1.09734	3.85e-12	2.51e-11
LEPRE1	64175	-1.19762	5.1e-20	1.05e-18
LEPREL1	55214	1.75802	1.99e-16	2.35e-15
LFNG	3955	-1.05553	1.09e-12	7.62e-12
LGALS2	3957	2.62396	4.4e-13	3.25e-12
LGALS3	3958	1.25945	7.6e-17	9.57e-16
LGALS4	3960	1.76908	8.53e-28	6.09e-26
LGALS9B	284194	1.75199	5.5e-17	7.05e-16
LGALS9C	654346	2.40417	9.52e-19	1.61e-17
LGI1	9211	1.08511	1.66e-28	1.4e-26
LGI4	163175	1.75669	7.39e-22	2.03e-20
LGR4	55366	1.39273	9.93e-16	1.05e-14
LGR5	8549	-2.09177	6.14e-14	5.07e-13
LGR6	59352	-1.06163	2.18e-05	5.78e-05
LIF	3976	-1.53023	3.23e-19	5.9e-18
LIFR	3977	1.67391	4.54e-30	5.47e-28
LILRB5	10990	1.82929	4.3e-23	1.41e-21
LIMA1	51474	1.58201	4.11e-19	7.34e-18
LIME1	54923	-1.35808	1.59e-16	1.91e-15
LIMK1	3984	-1.11872	2.31e-22	6.9e-21
LIMS2	55679	1.70478	1.07e-08	4.45e-08
LINC00346	283487	-1.32788	1.64e-12	1.13e-11
LIPC	3990	1.01145	3.99e-19	7.15e-18
LIPG	9388	-1.09261	2.9e-12	1.92e-11
LIPH	200879	1.20283	8.73e-12	5.43e-11
LITAF	9516	1.02514	6.15e-17	7.83e-16
LMNB2	84823	-1.32805	7.29e-20	1.45e-18
LMO2	4005	1.03703	9.5e-17	1.18e-15
LMO3	55885	2.0749	5e-12	3.21e-11
LMOD1	25802	2.92279	1.42e-16	1.73e-15
LMTK3	114783	-1.06192	1.4e-20	3.12e-19
LONP1	9361	-1.00684	2.46e-16	2.87e-15
LOXL2	4017	-1.69484	1.15e-17	1.66e-16
LPAR1	1902	1.81671	6.66e-28	4.88e-26
LPHN2	23266	1.01167	4.63e-07	1.55e-06
LPP	4026	1.37816	2.82e-13	2.14e-12
LRFN4	78999	-1.23666	4.54e-15	4.36e-14
LRMP	4033	2.20674	1.05e-19	2.06e-18
LRP8	7804	-2.04399	3.43e-30	4.22e-28
LRRC1	55227	1.09999	1.37e-17	1.96e-16
LRRC19	64922	2.95577	1.49e-29	1.61e-27
LRRC31	79782	1.28993	7.68e-12	4.83e-11
LRRC36	55282	-1.84115	1.22e-19	2.37e-18
LRRC61	65999	-1.19982	9.57e-23	2.99e-21
LRRC66	339977	1.41701	4.67e-17	6.07e-16
LRRK2	120892	1.23045	1.66e-10	8.69e-10
LRRN2	10446	2.36807	6.71e-28	4.9e-26
LRRN4CL	221091	1.13364	4.8e-15	4.59e-14
LSM7	51690	-1.37396	1.94e-19	3.65e-18
LSP1	4046	1.2696	3.21e-13	2.41e-12
LTB4R	1241	-1.30773	2.64e-15	2.62e-14
LTBP4	8425	1.14474	2.53e-12	1.69e-11
LTK	4058	1.34464	1.09e-09	5.13e-09
LXN	56925	1.24333	4.87e-12	3.14e-11
LY6E	4061	-1.89532	2.93e-15	2.89e-14
LY6G6C	80740	-1.07041	7.63e-11	4.18e-10
LY6G6D	58530	-2.74843	5.24e-12	3.35e-11
LY9	4063	1.07484	9.65e-16	1.02e-14
LY96	23643	1.07338	4.96e-08	1.9e-07
LYAR	55646	-1.1271	3.75e-14	3.19e-13
LYNX1	66004	2.06612	1e-14	9.18e-14
LYVE1	10894	2.97664	1.13e-29	1.26e-27
LZTS3	9762	-1.60831	4.14e-20	8.67e-19
MAB21L2	10586	2.25393	2.03e-11	1.2e-10
MACC1	346389	-1.71593	5.31e-20	1.09e-18
MACROD1	28992	-1.13087	1.09e-15	1.15e-14
MAD2L1	4085	-1.21028	8.61e-14	6.98e-13
MAD2L2	10459	-1.26381	9.94e-23	3.1e-21
MADCAM1	8174	1.44286	7.45e-20	1.48e-18
MAF	4094	1.44523	4.17e-13	3.08e-12
MAGI3	260425	1.07182	1.15e-15	1.2e-14
MAL	4118	2.62378	7.64e-29	7.01e-27
MALL	7851	1.93062	9.48e-25	4e-23
MAMDC2	256691	2.81648	1.21e-35	4.47e-33
MAN1A1	4121	1.36033	3.18e-15	3.12e-14
MAOA	4128	2.06904	1.83e-23	6.5e-22
MAOB	4129	2.00677	3.9e-14	3.31e-13
MAP1B	4131	1.40808	1.78e-08	7.22e-08
MAP4K1	11184	1.20233	9.33e-10	4.45e-09
MAPK15	225689	-1.90264	3.1e-28	2.44e-26
MAPT	4137	2.12053	1.88e-13	1.46e-12
MARVELD3	91862	1.05702	1.45e-14	1.3e-13
MASP1	5648	1.81131	1.22e-10	6.5e-10
MATN2	4147	1.61263	3.96e-14	3.35e-13
MB	4151	1.74533	1.97e-12	1.34e-11
MCM10	55388	-1.13977	6.39e-20	1.29e-18
MCM2	4171	-1.46763	2.07e-23	7.21e-22
MCM3	4172	-1.16189	9.63e-26	4.89e-24
MCM4	4173	-1.12186	2.37e-17	3.26e-16
MCM7	4176	-1.4673	9.54e-29	8.59e-27
MCOLN2	255231	1.5091	4.37e-10	2.17e-09
MDFI	4188	-3.01363	1.96e-37	9.85e-35
MEF2C	4208	1.29006	1.04e-19	2.04e-18
MEGF6	1953	-1.14481	1.19e-12	8.27e-12
MEIS1	4211	1.66827	3.74e-11	2.13e-10
MEIS2	4212	1.09125	5.65e-09	2.43e-08
MELK	9833	-1.29817	1.23e-15	1.28e-14
MEP1A	4224	2.37419	1.75e-15	1.78e-14
MEP1B	4225	3.083	5.3e-14	4.4e-13
MEST	4232	-1.05257	4.35e-15	4.19e-14
MET	4233	-1.75331	3.47e-21	8.58e-20
METTL1	4234	-1.31859	4.6e-33	9.92e-31
METTL24	728464	1.30649	1.88e-12	1.28e-11
METTL7A	25840	2.53592	7.61e-33	1.51e-30
MEX3A	92312	-1.39263	2.4e-18	3.79e-17
MEX3D	399664	-1.18959	1.03e-21	2.76e-20
MFAP2	4237	-2.18944	5.61e-20	1.15e-18
MFAP4	4239	2.09178	2.89e-16	3.32e-15
MFAP5	8076	2.68044	4.09e-17	5.37e-16
MFI2	4241	-1.907	2.9e-17	3.92e-16
MFSD12	126321	-1.69685	5.29e-33	1.1e-30
MFSD4	148808	1.96723	3.54e-13	2.65e-12
MGAM	8972	1.17894	1.24e-05	3.4e-05
MGAT4A	11320	1.24204	1.29e-16	1.57e-15
MGAT5	4249	-1.0596	7.16e-10	3.46e-09
MGLL	11343	1.20759	1.22e-17	1.76e-16
MGP	4256	2.09765	1.74e-12	1.19e-11
MICALCL	84953	1.49401	3.47e-17	4.64e-16
MID1IP1	58526	-1.12059	6.55e-19	1.14e-17
MIER1	57708	1.25434	5.15e-16	5.7e-15
MIER3	166968	1.79651	3.37e-23	1.13e-21
MIF	4282	-1.41521	2.36e-14	2.06e-13
MIPOL1	145282	1.59558	1.67e-14	1.48e-13
MLXIPL	51085	-2.39234	8.27e-21	1.92e-19
MME	4311	-1.28563	2.03e-05	5.4e-05
MMP1	4312	-3.64316	3.43e-20	7.26e-19
MMP10	4319	-1.39088	3.68e-11	2.1e-10
MMP11	4320	-3.41378	1.1e-26	6.42e-25
MMP12	4321	-1.7041	2.36e-09	1.07e-08
MMP14	4323	-1.14126	7.03e-12	4.44e-11
MMP28	79148	2.54799	3.53e-29	3.44e-27
MMP3	4314	-3.41987	4.04e-21	9.81e-20
MMP7	4316	-4.12081	9.65e-27	5.78e-25
MMP9	4318	-1.39475	2.37e-07	8.28e-07
MMRN1	22915	2.07729	1.37e-26	7.87e-25
MNX1	3110	-1.08058	1.8e-12	1.23e-11
MOB3B	79817	1.39659	7.74e-25	3.32e-23
MOBP	4336	1.10623	5.9e-23	1.89e-21
MOCS1	4337	1.50049	7.53e-18	1.11e-16
MOGAT2	80168	3.08771	8.06e-22	2.19e-20
MORC4	79710	-1.34433	2.34e-16	2.75e-15
MORN5	254956	1.85303	1.36e-09	6.35e-09
MPC1	51660	1.23594	5.08e-23	1.66e-21
MPEG1	219972	1.67707	2.05e-17	2.84e-16
MPG	4350	-1.04837	9.36e-19	1.58e-17
MPP6	51678	-1.28866	2.8e-10	1.43e-09
MPP7	143098	1.04485	2.66e-13	2.02e-12
MPZ	4359	1.57382	1.18e-17	1.7e-16
MRC1	4360	1.0972	2.97e-09	1.32e-08
MRGBP	55257	-1.59289	2.17e-33	5.14e-31
MRGPRF	116535	1.74824	1.03e-10	5.56e-10
MROH6	642475	-1.66177	6.42e-19	1.11e-17
MRPL17	63875	-1.23527	2.1e-26	1.17e-24
MRPS12	6183	-1.00243	4.85e-16	5.4e-15
MRVI1	10335	1.1488	8.87e-08	3.28e-07
MS4A1	931	2.37722	7.07e-10	3.42e-09
MS4A12	54860	6.04071	9.65e-30	1.08e-27
MS4A2	2206	1.731	1.2e-15	1.25e-14
MS4A4A	51338	1.30525	2.34e-09	1.06e-08
MS4A6A	64231	1.15377	9.92e-10	4.71e-09
MS4A7	58475	1.18439	7.08e-10	3.42e-09
MS4A8	83661	1.65034	5.02e-09	2.17e-08
MSI2	124540	-1.01671	2.1e-13	1.62e-12
MSLN	10232	-1.75135	1.7e-07	6.05e-07
MSRB3	253827	1.78758	1.95e-10	1.01e-09
MST1	4485	-1.28176	2.89e-11	1.67e-10
MSX1	4487	-1.48053	1.04e-16	1.28e-15
MSX2	4488	-2.36888	3.7e-25	1.69e-23
MT1A	4489	1.15441	1.32e-05	3.61e-05
MT1E	4493	3.10888	1.94e-17	2.71e-16
MT1F	4494	2.76883	9.47e-21	2.18e-19
MT1G	4495	3.57611	8.74e-21	2.01e-19
MT1H	4496	3.79628	1.5e-21	3.93e-20
MT1M	4499	4.03749	3.86e-27	2.45e-25
MT1X	4501	2.50193	1.35e-23	4.87e-22
MT2A	4502	2.28166	1.27e-18	2.11e-17
MTBP	27085	-1.35641	1.15e-13	9.11e-13
MTFR2	113115	-1.09762	1.46e-17	2.06e-16
MTG2	26164	-1.01479	5.04e-15	4.8e-14
MTHFD1L	25902	-2.13357	6.46e-38	3.73e-35
MTHFD2	10797	-1.35849	1.33e-18	2.2e-17
MTM1	4534	1.17311	1.75e-19	3.32e-18
MTUS1	57509	1.01148	5.13e-12	3.29e-11
MUC12	10071	1.66134	5.04e-07	1.68e-06
MUC2	4583	1.44336	0.000783111	0.00165603
MUC4	4585	1.77426	3.64e-08	1.42e-07
MUC5AC	4586	-1.88028	9.41e-07	3.02e-06
MXD1	4084	1.64196	5.18e-16	5.72e-15
MXI1	4601	1.53129	2.5e-23	8.57e-22
MYBBP1A	10514	-1.10714	4.93e-18	7.42e-17
MYBL2	4605	-2.0789	1.04e-26	6.17e-25
MYC	4609	-1.9234	3.58e-23	1.19e-21
MYEOV	26579	-2.35624	1.37e-18	2.25e-17
MYH11	4629	4.17006	1.82e-17	2.56e-16
MYL9	10398	2.30129	8.83e-10	4.23e-09
MYLK	4638	2.70629	1.87e-16	2.22e-15
MYO1A	4640	1.80863	2.27e-18	3.61e-17
MYOC	4653	2.07895	3.07e-27	1.98e-25
MYOCD	93649	2.7164	1.64e-17	2.31e-16
MYOM1	8736	1.5206	8.15e-17	1.02e-15
MYOM3	127294	-1.65739	1.11e-10	5.97e-10
MYOT	9499	1.11302	9.18e-22	2.48e-20
MZB1	51237	2.10011	3.59e-12	2.34e-11
MZT1	440145	-1.0162	6.91e-09	2.93e-08
MZT2A	653784	-1.04376	1.12e-17	1.62e-16
NAA10	8260	-1.36538	4.75e-22	1.36e-20
NAAA	27163	1.87608	1.13e-26	6.58e-25
NAALADL1	10004	2.47121	1.87e-20	4.08e-19
NANOS3	342977	-1.92248	1.39e-13	1.09e-12
NAP1L2	4674	1.38892	1.2e-30	1.6e-28
NAT1	9	1.3155	5.35e-17	6.88e-16
NAT10	55226	-1.0862	1.01e-21	2.72e-20
NAT2	10	1.70293	4.91e-20	1.02e-18
NAT9	26151	-1.13928	1.8e-28	1.51e-26
NBEAL1	65065	1.44347	2.16e-24	8.66e-23
NBEAL2	23218	-1.38273	5.61e-20	1.15e-18
NBPF1	55672	1.17336	5.9e-21	1.4e-19
NCAM1	4684	2.15902	2.12e-21	5.38e-20
NCAPD3	23310	-1.12309	1.15e-21	3.07e-20
NCAPG2	54892	-1.21112	1.39e-18	2.29e-17
NCAPH	23397	-1.11807	3.33e-16	3.8e-15
NDN	4692	1.56573	9.38e-19	1.59e-17
NDRG2	57447	1.32098	5.2e-24	1.99e-22
NDRG4	65009	1.14328	4.97e-09	2.15e-08
NDUFA4L2	56901	-1.64175	1.94e-12	1.32e-11
NEBL	10529	-1.80595	1.41e-19	2.73e-18
NEDD4L	23327	1.24764	5.25e-20	1.08e-18
NEGR1	257194	1.34371	1.43e-18	2.34e-17
NEK2	4751	-1.28654	2.78e-19	5.1e-18
NEK5	341676	-1.23137	3.31e-12	2.17e-11
NELFCD	51497	-1.47472	1.06e-28	9.55e-27
NEO1	4756	1.02029	5.26e-13	3.84e-12
NEU4	129807	1.99508	1.13e-15	1.19e-14
NEURL1	9148	1.08661	1.34e-06	4.21e-06
NEURL1B	54492	1.30056	9.88e-17	1.22e-15
NEUROD1	4760	1.89925	3.27e-19	5.97e-18
NEXN	91624	1.78105	6.46e-09	2.76e-08
NFE2L3	9603	-2.40111	6.14e-32	1.04e-29
NGFR	4804	1.17212	4.75e-12	3.07e-11
NIPAL1	152519	1.44912	6.29e-14	5.19e-13
NKD1	85407	-2.78963	3.09e-15	3.03e-14
NKD2	85409	-2.71031	1.1e-22	3.4e-21
NKRF	55922	-1.0211	6.4e-18	9.49e-17
NKX2-3	159296	2.1032	3.13e-29	3.11e-27
NLE1	54475	-1.19163	2.26e-30	2.85e-28
NLGN1	22871	1.69949	4.85e-18	7.32e-17
NLGN4X	57502	1.83679	4.92e-20	1.02e-18
NLRP2	55655	1.60283	1.44e-06	4.5e-06
NMB	4828	-1.39031	1.03e-23	3.78e-22
NME1	4830	-1.71307	2.9e-28	2.29e-26
NMU	10874	-1.2018	1.67e-07	5.95e-07
NOB1	28987	-1.37952	4.51e-30	5.47e-28
NOC4L	79050	-1.02047	5.34e-25	2.38e-23
NOD2	64127	-1.22862	3.3e-11	1.89e-10
NOL6	65083	-1.21334	1.08e-24	4.49e-23
NOLC1	9221	-1.09434	5.7e-18	8.53e-17
NONO	4841	-1.01811	3.85e-25	1.75e-23
NOP16	51491	-1.17657	4.83e-24	1.86e-22
NOP2	4839	-1.46448	6.59e-31	9.74e-29
NOP56	10528	-1.43787	4.73e-29	4.47e-27
NOP58	51602	-1.0329	2.95e-12	1.95e-11
NOS3	4846	-1.01857	6.48e-13	4.66e-12
NOTCH3	4854	-1.40962	1.23e-12	8.55e-12
NOTUM	147111	-3.26144	5.15e-13	3.77e-12
NPEPL1	79716	-1.06507	4.1e-15	3.97e-14
NPM3	10360	-1.58581	5.97e-25	2.63e-23
NPR3	4883	1.25369	3.39e-06	1.01e-05
NPRL3	8131	-1.23692	1.22e-27	8.43e-26
NPSR1	387129	-1.06252	5.25e-05	0.000131924
NPTX1	4884	2.04518	2.68e-11	1.55e-10
NPTX2	4885	-1.09751	0.000377642	0.000838402
NPW	283869	-1.41423	3.07e-09	1.36e-08
NPY	4852	1.33357	1.61e-22	4.91e-21
NPY1R	4886	1.18646	3.63e-17	4.82e-16
NQO2	4835	-1.02308	7e-14	5.75e-13
NR0B2	8431	-1.14496	3.77e-07	1.28e-06
NR1H4	9971	1.74571	1.6e-13	1.25e-12
NR2C2AP	126382	-1.17231	1.65e-30	2.15e-28
NR3C1	2908	1.50435	2.03e-21	5.17e-20
NR3C2	4306	2.62957	1.54e-32	2.8e-30
NR5A2	2494	2.02154	1.89e-31	3.1e-29
NRG1	3084	1.0447	1.26e-10	6.69e-10
NRG4	145957	1.10968	4.93e-16	5.47e-15
NRXN1	9378	1.41884	2.01e-20	4.37e-19
NSDHL	50814	-1.10585	2.63e-17	3.59e-16
NSG2	51617	1.59559	1.23e-25	6.11e-24
NSMF	26012	-1.12596	3.05e-14	2.62e-13
NSUN5	55695	-1.06796	4.44e-33	9.69e-31
NT5DC2	64943	-1.6333	7.86e-21	1.83e-19
NTHL1	4913	-1.24539	4.88e-19	8.62e-18
NTMT1	28989	-1.30128	7.88e-34	1.98e-31
NTN1	9423	1.73916	1.49e-21	3.92e-20
NUDCD1	84955	-1.10937	4.73e-16	5.26e-15
NUDT1	4521	-1.12644	8.87e-24	3.27e-22
NUF2	83540	-1.45712	2.38e-14	2.07e-13
NUP210	23225	-1.27351	9.02e-15	8.33e-14
NUSAP1	51203	-1.00713	3.49e-09	1.54e-08
NUTF2	10204	-1.12709	9.33e-27	5.6e-25
NXPE1	120400	2.7835	1.78e-20	3.89e-19
NXPE2	120406	1.34439	2.54e-13	1.93e-12
NXPE4	54827	3.83648	6.88e-21	1.62e-19
NXPH3	11248	1.10678	2.67e-07	9.25e-07
NXPH4	11247	-1.28971	1.02e-07	3.74e-07
NXT1	29107	-1.41067	1.94e-22	5.86e-21
OCEL1	79629	1.03076	1.15e-18	1.92e-17
ODC1	4953	-1.20899	2.56e-15	2.55e-14
OGN	4969	3.2349	6.16e-30	7.2e-28
OLFM1	10439	1.63204	3.22e-17	4.32e-16
OLFML1	283298	1.13399	1.18e-11	7.2e-11
OLFML2A	169611	1.03923	4.12e-06	1.21e-05
OLFML2B	25903	-1.5669	3.08e-09	1.37e-08
OLFML3	56944	1.04509	2.54e-07	8.84e-07
OLR1	4973	-1.3177	9.85e-14	7.89e-13
OMD	4958	1.30964	4.44e-16	4.96e-15
OPN3	23596	1.20684	1.78e-15	1.82e-14
ORC6	23594	-1.90524	7.22e-30	8.34e-28
OSBPL1A	114876	1.40908	3.7e-19	6.67e-18
OSBPL3	26031	-1.42942	6.53e-22	1.81e-20
OSM	5008	-1.4148	2.55e-09	1.14e-08
OSR1	130497	1.39948	6.06e-19	1.06e-17
OTOP2	92736	5.74302	4.17e-53	2.73e-49
OTOP3	347741	1.04789	9.71e-19	1.63e-17
OTX1	5013	-1.14928	2.98e-20	6.36e-19
OVGP1	5016	-1.09773	1.29e-21	3.43e-20
P2RX1	5023	1.23314	1.03e-23	3.77e-22
P2RY1	5028	2.26944	8.49e-31	1.22e-28
P2RY10	27334	1.19834	2.98e-10	1.52e-09
P2RY14	9934	1.77909	2.09e-26	1.17e-24
P4HA3	283208	-1.39565	7.77e-11	4.25e-10
PABPC1	26986	-1.03637	5.61e-21	1.34e-19
PABPC1L	80336	-2.45742	1.3e-22	3.99e-21
PADI2	11240	3.40101	3.82e-31	6.04e-29
PAFAH1B3	5050	-1.67131	3.44e-28	2.69e-26
PAFAH2	5051	1.08504	1.61e-21	4.2e-20
PAG1	55824	1.46475	2.8e-19	5.13e-18
PAICS	10606	-1.14251	2.58e-15	2.56e-14
PAK3	5063	1.0589	5.41e-16	5.95e-15
PALD1	27143	-1.71375	4.21e-18	6.41e-17
PALLD	23022	1.05675	2.62e-06	7.93e-06
PALM	5064	1.51498	6.39e-15	6e-14
PAMR1	25891	1.10649	1.13e-14	1.03e-13
PANK3	79646	1.12102	2.25e-14	1.97e-13
PAPSS2	9060	1.89999	4.24e-20	8.85e-19
PAQR4	124222	-1.92282	2.86e-34	7.92e-32
PAQR5	54852	1.76345	9.89e-22	2.66e-20
PAQR8	85315	1.47511	2.27e-14	1.99e-13
PARM1	25849	1.55597	5.13e-16	5.68e-15
PAX9	5083	-1.39691	3.81e-10	1.91e-09
PBLD	64081	2.11792	3.85e-21	9.41e-20
PBX1	5087	1.30859	4.92e-12	3.17e-11
PBX4	80714	-1.53995	9.84e-21	2.26e-19
PCDH7	5099	1.08908	5.67e-10	2.78e-09
PCED1A	64773	-1.09414	1.13e-13	9.03e-13
PCID2	55795	-1.0778	7.58e-22	2.08e-20
PCK1	5105	2.98924	2.31e-21	5.83e-20
PCNA	5111	-1.14645	5.43e-19	9.54e-18
PCOLCE2	26577	3.07817	1.15e-26	6.7e-25
PCP4L1	654790	1.2886	7.54e-09	3.18e-08
PCSK1N	27344	1.517	2.92e-09	1.3e-08
PCSK2	5126	1.26568	2.68e-23	9.11e-22
PCSK5	5125	2.20228	3.16e-29	3.12e-27
PCSK9	255738	-2.69276	1.54e-20	3.39e-19
PDCD2L	84306	-1.39562	4.69e-33	1e-30
PDCD4	27250	1.83481	1.03e-26	6.13e-25
PDCD5	9141	-1.02621	2.41e-21	6.06e-20
PDE2A	5138	1.54373	5.24e-19	9.21e-18
PDE3A	5139	2.0386	4.07e-23	1.35e-21
PDE4D	5144	1.06388	2.59e-12	1.73e-11
PDE5A	8654	1.60859	2.14e-18	3.41e-17
PDE6A	5145	1.43616	8.01e-30	9.04e-28
PDE9A	5152	2.50263	3.85e-25	1.75e-23
PDF	64146	-1.0185	3.87e-14	3.29e-13
PDGFD	80310	1.16516	4.27e-19	7.61e-18
PDGFRA	5156	1.08356	1.58e-10	8.31e-10
PDK4	5166	2.92466	1.69e-25	8.14e-24
PDLIM3	27295	1.67021	1.03e-09	4.87e-09
PDPN	10630	-1.54568	2.27e-14	1.99e-13
PDRG1	81572	-1.18167	2.43e-23	8.34e-22
PDX1	3651	-2.72472	3.95e-29	3.8e-27
PDZD3	79849	1.3623	1e-08	4.18e-08
PDZD4	57595	1.50526	1.96e-20	4.25e-19
PDZRN3	23024	1.03186	4.72e-07	1.58e-06
PDZRN4	29951	1.74248	2.91e-12	1.93e-11
PELI2	57161	1.41889	5.27e-14	4.38e-13
PENK	5179	1.63156	3.44e-07	1.17e-06
PER1	5187	1.05769	1.43e-06	4.48e-06
PER3	8863	1.67959	4.16e-17	5.45e-16
PERP	64065	-1.25528	1.37e-17	1.95e-16
PEX11A	8800	1.08908	4.1e-18	6.25e-17
PEX26	55670	1.37075	3.94e-23	1.31e-21
PFDN2	5202	-1.14902	1.54e-24	6.31e-23
PGAM5	192111	-1.08597	6.88e-23	2.19e-21
PGF	5228	-1.21942	4.7e-10	2.32e-09
PGM1	5236	1.37491	6.14e-27	3.79e-25
PGM5	5239	2.79794	1.4e-15	1.45e-14
PHF19	26147	-1.07673	4.37e-20	9.09e-19
PHGDH	26227	-1.28815	1.39e-07	5e-07
PHGR1	644844	1.94939	6.21e-13	4.49e-12
PHLDA1	22822	-2.32278	5.63e-22	1.58e-20
PHLDA2	7262	-1.43514	2.54e-11	1.47e-10
PHLPP2	23035	2.26749	1.96e-25	9.29e-24
PHYH	5264	1.12556	7.21e-18	1.06e-16
PI16	221476	2.98667	1.3e-29	1.42e-27
PID1	55022	1.87754	6.65e-19	1.15e-17
PIEZO1	9780	-1.12869	1.02e-12	7.18e-12
PIF1	80119	-1.03673	5.78e-17	7.41e-16
PIGR	5284	2.87857	3.1e-11	1.78e-10
PIGZ	80235	1.70734	1.25e-16	1.52e-15
PIK3CG	5294	1.07013	1.89e-17	2.63e-16
PILRB	29990	-1.08568	1.78e-09	8.15e-09
PINK1	65018	1.27994	5.75e-32	9.83e-30
PIRT	644139	1.17214	8.58e-22	2.33e-20
PITPNM3	83394	1.16759	2.05e-15	2.07e-14
PITX1	5307	-1.72438	7.23e-19	1.24e-17
PIWIL1	9271	-1.14688	1.82e-08	7.34e-08
PJA2	9867	1.34535	2.02e-20	4.39e-19
PKIB	5570	4.12961	2.34e-39	1.92e-36
PKMYT1	9088	-2.03756	1.73e-26	9.79e-25
PKNOX2	63876	1.23346	3.13e-29	3.11e-27
PKP1	5317	-1.4904	5.21e-15	4.95e-14
PLA2G10	8399	1.17581	3.61e-12	2.35e-11
PLA2G2A	5320	1.39491	0.00158941	0.00320213
PLA2G5	5322	1.0051	1.31e-07	4.73e-07
PLAC8	51316	3.45258	3.48e-21	8.58e-20
PLAC9	219348	2.23891	9.37e-31	1.32e-28
PLAU	5328	-2.03844	5.54e-19	9.71e-18
PLCD1	5333	1.84299	8.91e-25	3.77e-23
PLCD3	113026	1.45013	2.27e-16	2.67e-15
PLCE1	51196	1.71762	2.49e-30	3.11e-28
PLCG2	5336	1.60853	1.87e-16	2.22e-15
PLCL2	23228	2.28417	3.32e-22	9.74e-21
PLEKHB1	58473	-1.00684	5.83e-06	1.68e-05
PLEKHG4	25894	-1.59199	1.63e-18	2.66e-17
PLEKHN1	84069	-1.50976	2.35e-34	6.88e-32
PLEKHO1	51177	1.165	6.76e-08	2.54e-07
PLEKHS1	79949	-1.93762	3.22e-15	3.15e-14
PLIN4	729359	2.02026	7.08e-09	3e-08
PLK1	5347	-1.57513	5.49e-23	1.78e-21
PLN	5350	2.71738	7.22e-14	5.93e-13
PLOD2	5352	1.05151	4.15e-08	1.61e-07
PLOD3	8985	-1.43344	7.06e-27	4.32e-25
PLP1	5354	4.2975	4.76e-36	1.99e-33
PLS1	5357	1.34211	4.56e-14	3.82e-13
PLSCR4	57088	1.46784	3.25e-19	5.93e-18
PLXNA1	5361	-1.40465	8.39e-27	5.09e-25
PLXNA3	55558	-1.14535	2.23e-17	3.07e-16
PMAIP1	5366	-1.48726	8.06e-19	1.38e-17
PMEPA1	56937	-1.46004	1.35e-12	9.39e-12
PMFBP1	83449	-1.03567	2.77e-09	1.24e-08
PNCK	139728	1.68662	4.5e-07	1.51e-06
PNO1	56902	-1.01339	1.09e-15	1.15e-14
PNOC	5368	1.32552	3.06e-14	2.63e-13
PODNL1	79883	-1.4149	3.23e-16	3.68e-15
PODXL2	50512	-1.2867	1.28e-15	1.33e-14
POLD1	5424	-1.02994	2.34e-14	2.05e-13
POLD2	5425	-1.37528	5.12e-30	6.1e-28
POLR1B	84172	-1.08059	1.99e-23	6.99e-22
POLR1C	9533	-1.32689	2.08e-35	7.3e-33
POLR3G	10622	-1.18714	6.79e-09	2.88e-08
POLR3K	51728	-1.14064	1.21e-23	4.38e-22
POP1	10940	-1.36684	6.31e-21	1.49e-19
POPDC2	64091	2.18696	4.27e-08	1.65e-07
POU2AF1	5450	1.58076	3.19e-10	1.62e-09
POU5F1B	5462	-1.19915	3.34e-14	2.85e-13
PPA1	5464	-1.11481	7.59e-21	1.77e-19
PPAP2A	8611	1.71715	2.81e-36	1.22e-33
PPAP2B	8613	1.251	1.99e-21	5.08e-20
PPAP2C	8612	-1.11852	2.13e-11	1.25e-10
PPAPDC1A	196051	-1.34147	2.78e-11	1.61e-10
PPARGC1A	10891	2.03527	1.26e-21	3.34e-20
PPARGC1B	133522	1.22698	4.17e-20	8.71e-19
PPAT	5471	-1.22495	5.38e-17	6.9e-16
PPBP	5473	-1.5582	6.59e-06	1.89e-05
PPIL1	51645	-1.09617	4.09e-19	7.32e-18
PPM1H	57460	-1.7506	4.45e-25	1.99e-23
PPP1R12B	4660	2.07787	2.05e-14	1.8e-13
PPP1R13L	10848	-1.22764	3.43e-16	3.9e-15
PPP1R14A	94274	1.9579	3.08e-12	2.03e-11
PPP1R14D	54866	1.87689	1.03e-17	1.5e-16
PPP1R16B	26051	1.14824	2.62e-17	3.56e-16
PPP1R1A	5502	1.43378	6.62e-10	3.21e-09
PPP1R35	221908	-1.24122	1.82e-26	1.02e-24
PPP1R36	145376	1.04948	1.28e-11	7.73e-11
PPP1R3C	5507	1.24406	1.27e-09	5.96e-09
PPP2R3A	5523	1.5311	2.46e-35	8.34e-33
PPP2R3B	28227	-1.32266	7.62e-23	2.41e-21
PPRC1	23082	-1.11232	1.29e-20	2.89e-19
PRC1	9055	-1.22789	1.39e-16	1.69e-15
PRDX4	10549	-1.3365	3.66e-21	8.97e-20
PRDX6	9588	1.42818	3.99e-25	1.81e-23
PRELP	5549	2.21401	8.95e-15	8.28e-14
PRIMA1	145270	2.40536	2.45e-27	1.62e-25
PRKACB	5567	2.34397	1.39e-25	6.79e-24
PRKAR2B	5577	1.6034	3.89e-19	6.98e-18
PRKCB	5579	1.94527	2.69e-20	5.78e-19
PRKCG	5582	-1.56215	5.41e-10	2.65e-09
PRKG2	5593	1.93809	1.93e-28	1.6e-26
PRMT1	3276	-1.39413	6.27e-18	9.34e-17
PRMT3	10196	-1.00737	2.63e-19	4.86e-18
PROM2	150696	1.63722	1.41e-11	8.49e-11
PROSER1	80209	-1.03605	4.24e-12	2.75e-11
PROX1	5629	-1.42043	6.32e-09	2.7e-08
PRPH	5630	2.95178	3.36e-30	4.15e-28
PRPS1	5631	-1.01993	7.11e-18	1.05e-16
PRR11	55771	-1.07921	4e-14	3.38e-13
PRR7	80758	-2.56815	4.69e-34	1.21e-31
PRRG3	79057	1.18569	1.88e-10	9.8e-10
PRRX1	5396	-1.0151	8.72e-05	0.000212219
PRSS22	64063	-3.06579	1.29e-28	1.13e-26
PRSS33	260429	-1.70411	7e-09	2.97e-08
PRUNE2	158471	1.12477	4.5e-05	0.000114482
PSAT1	29968	-2.56749	4.59e-27	2.85e-25
PSD	5662	1.92039	2.15e-10	1.11e-09
PSMA7	5688	-1.31584	2.94e-22	8.74e-21
PSMG4	389362	-1.06893	1.71e-19	3.25e-18
PSPH	5723	-1.29434	4.58e-22	1.31e-20
PSRC1	84722	-1.19061	1.25e-20	2.81e-19
PTGDR	5729	1.81798	8.87e-23	2.79e-21
PTGDR2	11251	1.22828	4.38e-17	5.71e-16
PTGDS	5730	1.172	2.01e-06	6.18e-06
PTGER4	5734	1.44817	4.53e-19	8.05e-18
PTGIS	5740	1.04958	3.45e-07	1.18e-06
PTGS1	5742	2.16251	6.37e-18	9.46e-17
PTK7	5754	-1.78326	2.66e-16	3.09e-15
PTN	5764	2.11219	1.24e-25	6.14e-24
PTP4A1	7803	1.02692	5.08e-11	2.85e-10
PTP4A3	11156	-1.97308	1.55e-17	2.18e-16
PTPLAD1	51495	-1.06492	8.26e-19	1.4e-17
PTPN21	11099	1.13657	3.23e-23	1.09e-21
PTPRC	5788	1.20287	1.69e-07	6.03e-07
PTPRH	5794	1.94353	4.32e-25	1.95e-23
PTPRR	5801	1.68902	1.36e-12	9.43e-12
PTTG1	9232	-1.09948	2.48e-12	1.67e-11
PUS1	80324	-1.5933	4.14e-29	3.97e-27
PUS7	54517	-1.47122	1.83e-21	4.72e-20
PVR	5817	-1.05599	3.41e-19	6.19e-18
PVRL3	25945	1.47492	4.13e-14	3.48e-13
PVRL4	81607	-1.44135	3.32e-14	2.84e-13
PXMP2	5827	1.5063	1.56e-24	6.37e-23
PYCR1	5831	-1.94116	1.97e-27	1.32e-25
PYCRL	65263	-1.52273	9.71e-25	4.07e-23
PYGM	5837	1.88801	4.99e-14	4.16e-13
PYY	5697	5.18323	1.97e-38	1.34e-35
QSOX2	169714	-1.2256	2.81e-25	1.3e-23
RAB15	376267	-1.31097	1.04e-17	1.5e-16
RAB27A	5873	1.41614	4.56e-18	6.9e-17
RAB27B	5874	1.10075	0.000116151	0.000277505
RAB36	9609	-1.25712	1.21e-16	1.48e-15
RAB3C	115827	1.83353	1.1e-20	2.5e-19
RACGAP1	29127	-1.10286	6.64e-19	1.15e-17
RAD51AP1	10635	-1.01711	3.2e-08	1.25e-07
RAD54L	8438	-1.43797	1.38e-18	2.27e-17
RAE1	8480	-1.24659	4.98e-22	1.41e-20
RAI2	10742	1.07756	3e-09	1.33e-08
RAN	5901	-1.10479	2.48e-25	1.16e-23
RANBP1	5902	-1.05308	7.09e-24	2.64e-22
RANGAP1	5905	-1.11897	3.3e-24	1.31e-22
RAP1A	5906	1.21507	2e-16	2.36e-15
RARRES1	5918	1.31423	3.37e-07	1.15e-06
RASD2	23551	1.5641	2.61e-16	3.04e-15
RASL12	51285	1.01208	1.9e-07	6.73e-07
RAVER2	55225	1.00996	4.27e-16	4.78e-15
RBBP8NL	140893	-1.1778	4.69e-15	4.5e-14
RBCK1	10616	-1.00528	1.7e-21	4.4e-20
RBFOX3	146713	1.68381	3.58e-09	1.58e-08
RBM24	221662	1.13635	1.21e-13	9.58e-13
RBM47	54502	1.20813	4.02e-19	7.21e-18
RBPMS2	348093	2.17967	1.24e-13	9.86e-13
RCAN1	1827	1.2534	9.03e-15	8.34e-14
RCAN2	10231	1.60934	1.39e-26	7.94e-25
RCC1	1104	-1.16829	7.71e-20	1.53e-18
RCN1	5954	-1.22727	3.75e-19	6.75e-18
RCSD1	92241	1.33226	2.51e-19	4.66e-18
RDH5	5959	1.8276	1.97e-30	2.52e-28
RECQL4	9401	-1.86168	1.87e-29	1.99e-27
REEP1	65055	1.18707	6.68e-07	2.19e-06
REEP2	51308	1.30849	5.48e-13	3.99e-12
REEP6	92840	-1.43967	7.61e-11	4.17e-10
REG1A	5967	-3.93723	1e-07	3.68e-07
REG1B	5968	-2.96553	2.88e-06	8.65e-06
REG3A	5068	-2.989	2.67e-08	1.06e-07
RELL1	768211	1.12377	3.41e-17	4.57e-16
REP15	387849	1.78806	9.38e-14	7.55e-13
RERG	85004	1.51231	1.67e-11	9.98e-11
RERGL	79785	2.15808	2.64e-27	1.73e-25
RETNLB	84666	2.18053	4.2e-08	1.62e-07
RETSAT	54884	1.61514	1.82e-26	1.02e-24
RFC3	5983	-1.52374	1e-22	3.13e-21
RFC4	5984	-1.05183	2.95e-18	4.62e-17
RFWD3	55159	-1.012	1.05e-21	2.8e-20
RGL1	23179	1.00786	8.92e-13	6.33e-12
RGMA	56963	1.76496	1e-13	8.02e-13
RGS13	6003	1.26075	2.77e-16	3.2e-15
RGS16	6004	-1.64785	1.98e-17	2.76e-16
RGS2	5997	1.67676	1.75e-10	9.15e-10
RGS5	8490	1.06434	4.37e-05	0.000111379
RGS9	8787	1.56103	1.25e-19	2.43e-18
RHBDF1	64285	-1.02587	9e-16	9.56e-15
RHBDF2	79651	-1.55016	2.01e-23	7.05e-22
RHBDL1	9028	-1.05982	5.45e-11	3.04e-10
RHBDL2	54933	1.79951	1.69e-16	2.02e-15
RHOF	54509	1.03441	8.06e-11	4.4e-10
RHOU	58480	1.26663	4.2e-19	7.49e-18
RHPN1	114822	-2.31198	6.36e-31	9.51e-29
RILP	83547	1.36602	4.99e-19	8.8e-18
RIMKLA	284716	1.33819	1.66e-14	1.47e-13
RIMKLB	57494	1.26248	1.8e-08	7.27e-08
RIN1	9610	-1.01524	3.17e-19	5.79e-18
RIOK3	8780	1.51176	3.26e-22	9.61e-21
RIPK2	8767	-1.30941	3.51e-25	1.61e-23
RMDN2	151393	1.90936	9.64e-26	4.89e-24
RNASEH2A	10535	-1.55825	1.14e-30	1.55e-28
RNASEL	6041	1.04308	1.54e-19	2.95e-18
RND2	8153	1.46676	1.92e-12	1.31e-11
RNF112	7732	1.78023	1.12e-30	1.55e-28
RNF125	54941	1.14716	4.36e-15	4.2e-14
RNF150	57484	1.32786	2.24e-11	1.31e-10
RNF152	220441	1.91811	1.3e-32	2.41e-30
RNF183	138065	-1.87406	1.13e-22	3.5e-21
RNF186	54546	1.00744	1.87e-05	5.02e-05
RNF32	140545	-1.00967	2.63e-12	1.75e-11
RNF43	54894	-2.05834	7.88e-18	1.15e-16
ROR1	4919	1.26795	6.82e-14	5.61e-13
RPL22L1	200916	-1.20304	2.24e-08	8.98e-08
RPL8	6132	-1.0716	1.27e-16	1.55e-15
RPS15	6209	-1.09175	3.3e-18	5.13e-17
RPS2	6187	-1.27857	2.39e-19	4.47e-18
RPS21	6227	-1.37415	5.29e-15	5.02e-14
RPS5	6193	-1.12008	2.13e-12	1.44e-11
RPS6KA5	9252	1.11318	3.96e-17	5.22e-16
RPS6KA6	27330	1.39853	1.55e-12	1.06e-11
RPUSD1	113000	-1.12771	3.2e-26	1.74e-24
RRM2	6241	-1.47229	2.59e-16	3.01e-15
RRP1	8568	-1.19494	2.19e-26	1.22e-24
RRP12	23223	-1.45924	5.55e-25	2.46e-23
RRP9	9136	-1.47487	1.66e-31	2.77e-29
RRS1	23212	-1.24026	4.1e-23	1.35e-21
RSAD2	91543	1.53323	1.72e-09	7.9e-09
RSPO2	340419	1.87727	9.61e-17	1.19e-15
RSPO3	84870	1.04684	6.9e-10	3.34e-09
RTKN	6242	-1.27536	9.06e-29	8.2e-27
RTN1	6252	1.02501	1.36e-14	1.22e-13
RTN4R	65078	-1.18071	3.58e-15	3.49e-14
RUNDC3B	154661	2.25693	6.44e-25	2.82e-23
RUNX1	861	-1.2838	1.94e-21	4.99e-20
RUVBL1	8607	-1.45845	4.13e-33	9.12e-31
RUVBL2	10856	-1.1254	3.02e-17	4.06e-16
RXRG	6258	1.04464	3.12e-29	3.11e-27
S100A11	6282	-1.87807	6.4e-31	9.51e-29
S100A2	6273	-2.09824	5.67e-24	2.14e-22
S100A9	6280	-1.30561	1.02e-05	2.83e-05
S100B	6285	1.79708	7.55e-14	6.18e-13
S100P	6286	-2.7046	1.79e-16	2.14e-15
SALL4	57167	-1.0625	2.37e-17	3.25e-16
SAMD10	140700	-1.21999	1.89e-20	4.11e-19
SAMD13	148418	1.38302	1.27e-15	1.32e-14
SAMD9	54809	1.21817	3.04e-11	1.75e-10
SAPCD2	89958	-1.90185	1.1e-25	5.5e-24
SATB2	23314	1.09629	1.1e-07	4e-07
SCAMP5	192683	1.01545	1.74e-07	6.19e-07
SCARA3	51435	1.37017	4.59e-11	2.59e-10
SCARA5	286133	3.57662	1.07e-45	1.75e-42
SCARB1	949	-1.01863	1.03e-12	7.27e-12
SCD	6319	-2.33549	2.58e-19	4.78e-18
SCG2	7857	1.87441	5.43e-23	1.76e-21
SCG3	29106	1.01093	1.65e-28	1.4e-26
SCGB2A1	4246	1.99911	1.36e-17	1.94e-16
SCGN	10590	3.28807	6.45e-48	2.11e-44
SCIN	85477	2.59836	1.53e-21	3.99e-20
SCML1	6322	-1.18819	2.07e-14	1.82e-13
SCN4B	6330	1.02733	3e-24	1.2e-22
SCN7A	6332	2.03121	2.1e-18	3.35e-17
SCN9A	6335	1.42098	3.09e-37	1.52e-34
SCNN1B	6338	4.44134	1.48e-27	1.01e-25
SCNN1G	6340	1.44251	1.29e-09	6.02e-09
SCP2	6342	1.21228	9.09e-17	1.13e-15
SCUBE2	57758	1.6455	4.29e-19	7.65e-18
SDCBP2	27111	2.41656	3.33e-24	1.32e-22
SDCCAG3	10807	-1.22427	3.19e-34	8.46e-32
SDHD	6392	1.2595	8.47e-15	7.85e-14
SDPR	8436	2.32948	4.9e-20	1.02e-18
SECISBP2L	9728	1.11159	2.18e-10	1.12e-09
SECTM1	6398	2.71291	1.53e-21	3.99e-20
SELENBP1	8991	2.25719	2.1e-20	4.54e-19
SEMA3F	6405	-1.1506	1.83e-11	1.08e-10
SEMA3G	56920	1.31556	1.63e-15	1.67e-14
SEMA6A	57556	2.40577	9.47e-31	1.33e-28
SEMA6D	80031	2.28549	8.2e-33	1.61e-30
SEPP1	6414	3.2726	1.81e-23	6.42e-22
SERPINA5	5104	1.09789	1.71e-09	7.86e-09
SERPINB5	5268	-2.46187	1e-12	7.06e-12
SERPINE1	5054	-1.88318	2.18e-11	1.28e-10
SERPINE2	5270	-1.13368	1.45e-10	7.67e-10
SERPINF2	5345	-1.17182	5.31e-10	2.61e-09
SERPINH1	871	-1.36491	2.92e-20	6.24e-19
SERTAD4	56256	1.05009	1.22e-13	9.64e-13
SETBP1	26040	1.65579	8.33e-17	1.04e-15
SEZ6L2	26470	-1.05516	4.38e-10	2.18e-09
SF3B3	23450	-1.01692	9.69e-22	2.61e-20
SFRP1	6422	2.98785	1.05e-26	6.23e-25
SFRP2	6423	1.69775	1.69e-06	5.24e-06
SFRP4	6424	-2.1439	3.11e-11	1.79e-10
SFRP5	6425	1.36704	5.09e-13	3.73e-12
SFTA2	389376	-1.53203	6.29e-14	5.19e-13
SFXN3	81855	-1.15338	4.16e-19	7.43e-18
SGCA	6442	1.899	2.22e-14	1.95e-13
SGCE	8910	1.57641	1.26e-11	7.62e-11
SGK1	6446	2.16717	2.27e-15	2.28e-14
SGK2	10110	1.82108	8.36e-15	7.76e-14
SH2D6	284948	1.61864	8.18e-14	6.65e-13
SH2D7	646892	1.57493	3.18e-22	9.38e-21
SH3BGR	6450	1.39127	1.28e-11	7.74e-11
SH3BGRL	6451	1.10836	3.37e-09	1.49e-08
SH3BGRL2	83699	1.08663	2.39e-14	2.08e-13
SH3BP4	23677	-1.08488	7.17e-15	6.71e-14
SH3GL2	6456	1.70147	3.54e-22	1.03e-20
SH3TC2	79628	-1.59132	1.49e-21	3.92e-20
SHB	6461	-1.03856	2.31e-23	8e-22
SHCBP1	79801	-1.09611	9.59e-19	1.61e-17
SHE	126669	1.63848	1.96e-18	3.14e-17
SHH	6469	-1.54467	1.67e-16	2e-15
SHISA2	387914	-1.17613	1.59e-19	3.04e-18
SHISA3	152573	1.45898	2.96e-13	2.23e-12
SHMT2	6472	-1.49732	5.17e-30	6.12e-28
SHROOM4	57477	-1.29016	1.61e-14	1.43e-13
SI	6476	2.17422	9.65e-12	5.96e-11
SIAE	54414	1.44756	2.62e-20	5.63e-19
SIGLEC1	6614	1.09437	4.67e-10	2.31e-09
SIGLEC8	27181	1.08129	1.63e-16	1.95e-15
SIGMAR1	10280	-1.33662	3.84e-28	2.98e-26
SIM2	6493	-2.67908	5.31e-35	1.66e-32
SIPA1L2	57568	1.13279	2.19e-17	3.02e-16
SKA3	221150	-1.60505	4.98e-24	1.91e-22
SLAMF7	57823	1.73143	2.05e-11	1.2e-10
SLC11A1	6556	-1.23047	2.03e-14	1.79e-13
SLC11A2	4891	-1.09834	9.82e-17	1.22e-15
SLC12A2	6558	-1.35664	1.1e-15	1.15e-14
SLC12A8	84561	-1.15869	2.24e-18	3.57e-17
SLC13A2	9058	2.05518	9.17e-12	5.69e-11
SLC13A3	64849	-1.36401	9.91e-11	5.36e-10
SLC15A1	6564	1.24396	4.17e-06	1.23e-05
SLC16A9	220963	2.14723	6.05e-20	1.23e-18
SLC17A4	10050	2.63496	3.04e-28	2.4e-26
SLC17A9	63910	-1.99364	5.6e-16	6.15e-15
SLC1A1	6505	1.52759	8.84e-12	5.5e-11
SLC1A5	6510	-1.31592	1.57e-19	3.01e-18
SLC20A1	6574	1.05531	1.52e-07	5.46e-07
SLC22A17	51310	1.29484	1.18e-13	9.41e-13
SLC22A18AS	5003	2.04401	3.48e-24	1.37e-22
SLC22A23	63027	1.17351	1.23e-15	1.28e-14
SLC22A3	6581	-1.45491	1.55e-15	1.59e-14
SLC22A5	6584	1.40223	4.1e-20	8.58e-19
SLC23A1	9963	1.49084	2.34e-11	1.37e-10
SLC25A15	10166	-1.01964	1.77e-16	2.11e-15
SLC25A20	788	1.3669	2.33e-28	1.89e-26
SLC25A22	79751	-1.18439	2.66e-19	4.91e-18
SLC25A23	79085	1.55996	1.3e-29	1.42e-27
SLC25A29	123096	-1.12005	9.89e-15	9.09e-14
SLC25A34	284723	2.33837	2.45e-39	1.93e-36
SLC26A2	1836	4.42162	1.61e-28	1.37e-26
SLC26A3	1811	5.93953	2.68e-27	1.75e-25
SLC27A5	10998	-1.23555	8.34e-12	5.21e-11
SLC27A6	28965	1.06349	8.45e-25	3.59e-23
SLC28A2	9153	1.63016	2.93e-06	8.8e-06
SLC29A1	2030	-1.37195	4.99e-15	4.76e-14
SLC2A1	6513	-1.6558	6.35e-16	6.9e-15
SLC2A13	114134	1.40652	8.25e-25	3.52e-23
SLC2A4	6517	1.53608	8.85e-12	5.5e-11
SLC30A10	55532	2.94445	1.17e-28	1.04e-26
SLC35A3	23443	1.01182	2.03e-09	9.27e-09
SLC35D1	23169	1.19397	1.62e-16	1.94e-15
SLC35D3	340146	-1.5619	2.79e-10	1.42e-09
SLC35E4	339665	-1.0809	2.99e-13	2.26e-12
SLC35G1	159371	1.14361	2.27e-16	2.66e-15
SLC36A1	206358	1.60045	1.74e-18	2.81e-17
SLC38A4	55089	1.3714	5.09e-12	3.27e-11
SLC38A5	92745	-1.72809	1.32e-10	7.04e-10
SLC39A10	57181	-1.76566	1.19e-30	1.6e-28
SLC39A5	283375	1.52379	2.43e-09	1.09e-08
SLC3A1	6519	1.18875	3.86e-06	1.14e-05
SLC3A2	6520	-1.16225	5.68e-24	2.14e-22
SLC41A2	84102	1.53228	6.15e-20	1.25e-18
SLC43A1	8501	-1.09355	3.37e-14	2.88e-13
SLC44A4	80736	1.49048	9.88e-21	2.27e-19
SLC46A3	283537	1.58656	3.45e-18	5.34e-17
SLC47A1	55244	1.07063	3.83e-12	2.49e-11
SLC4A10	57282	2.5643	4.28e-27	2.69e-25
SLC4A11	83959	-1.62167	2.93e-20	6.24e-19
SLC4A4	8671	4.49187	4.8e-42	5.55e-39
SLC51A	200931	2.90133	6.97e-15	6.53e-14
SLC51B	123264	4.03301	3.53e-38	2.17e-35
SLC52A2	79581	-1.20346	1.95e-18	3.14e-17
SLC5A6	8884	-1.84608	2.72e-23	9.26e-22
SLC6A14	11254	-1.30449	5.8e-06	1.67e-05
SLC6A19	340024	2.89413	7.07e-17	8.92e-16
SLC6A20	54716	-1.50349	4.54e-09	1.98e-08
SLC6A6	6533	-2.84977	1.95e-29	2.04e-27
SLC6A8	6535	1.04396	6.08e-07	2e-06
SLC6A9	6536	1.12338	1.78e-12	1.22e-11
SLC7A1	6541	-1.165	2.55e-16	2.97e-15
SLC7A11	23657	-1.19281	2.38e-14	2.07e-13
SLC7A5	8140	-2.93349	8.26e-33	1.61e-30
SLC9A1	6548	1.18282	6.09e-16	6.63e-15
SLC9A2	6549	2.14592	3.09e-24	1.23e-22
SLC9A3	6550	3.12554	8.07e-12	5.05e-11
SLC9A9	285195	1.3709	4.61e-26	2.45e-24
SLCO1B3	28234	-1.40764	3.52e-10	1.77e-09
SLCO2A1	6578	1.68505	1.44e-20	3.2e-19
SLCO4A1	28231	-3.07488	3.97e-35	1.3e-32
SLIT2	9353	1.20572	1.13e-11	6.9e-11
SLIT3	6586	1.7609	3.03e-17	4.07e-16
SLMAP	7871	1.13729	1.09e-09	5.13e-09
SLMO1	10650	-1.40094	4.88e-27	3.02e-25
SMCHD1	23347	1.10863	2.44e-14	2.12e-13
SMIM10	644538	1.03685	4.02e-10	2.01e-09
SMIM14	201895	1.78332	6.51e-22	1.8e-20
SMIM6	100130933	1.45769	8.18e-19	1.39e-17
SMKR1	100287482	-1.34442	4.36e-16	4.88e-15
SMOX	54498	-2.36527	5.2e-36	2.13e-33
SMPD1	6609	1.59337	3.44e-27	2.2e-25
SMPD3	55512	1.0865	4.06e-13	3.01e-12
SMPDL3A	10924	2.53905	5.38e-29	5.05e-27
SMYD5	10322	-1.14174	7.34e-28	5.32e-26
SNAI1	6615	-1.44909	1.2e-19	2.34e-18
SNAP25	6616	1.22639	1.96e-15	1.98e-14
SNCA	6622	1.32063	3.51e-11	2.01e-10
SNCG	6623	1.608	2.59e-13	1.97e-12
SND1	27044	-1.15657	7.41e-30	8.51e-28
SNRPB	6628	-1.15919	7e-21	1.64e-19
SNRPF	6636	-1.10015	1.95e-23	6.85e-22
SNRPN	6638	1.16977	9.26e-08	3.41e-07
SNTB1	6641	-1.8859	6.96e-22	1.92e-20
SNX24	28966	1.57029	2.06e-21	5.23e-20
SOCS6	9306	1.00279	5.68e-16	6.22e-15
SORBS1	10580	1.59049	3.69e-08	1.44e-07
SORBS2	8470	1.47044	1.21e-10	6.45e-10
SORD	6652	-1.34705	1.86e-19	3.52e-18
SOS2	6655	1.00446	5.25e-15	4.99e-14
SOSTDC1	25928	1.37932	1.02e-12	7.19e-12
SOX12	6666	-1.14756	2.24e-12	1.51e-11
SOX14	8403	-1.29052	5.24e-09	2.26e-08
SOX4	6659	-1.50355	1.75e-19	3.32e-18
SOX9	6662	-2.0245	1.11e-27	7.76e-26
SP140	11262	1.1018	2.09e-07	7.36e-07
SP5	389058	-2.25372	6.32e-20	1.27e-18
SP6	80320	-1.21261	1.09e-10	5.87e-10
SPARC	6678	-1.37878	1.04e-09	4.94e-09
SPARCL1	8404	2.10275	1.07e-14	9.77e-14
SPATA33	124045	-1.0665	6.13e-28	4.54e-26
SPC24	147841	-1.25212	1.35e-17	1.94e-16
SPC25	57405	-1.07795	1.38e-13	1.09e-12
SPDEF	25803	1.39214	4.77e-07	1.6e-06
SPECC1	92521	1.24347	1.59e-16	1.91e-15
SPEG	10290	1.38433	1.25e-09	5.85e-09
SPG20	23111	1.21578	2.68e-12	1.78e-11
SPHK1	8877	-1.72347	1.2e-14	1.09e-13
SPIB	6689	3.53781	8.56e-47	2.01e-43
SPINK2	6691	1.79649	7.04e-27	4.32e-25
SPINK5	11005	1.86855	1.96e-10	1.02e-09
SPNS2	124976	-1.5535	4.98e-17	6.43e-16
SPON1	10418	1.53615	5.55e-09	2.38e-08
SPON2	10417	-1.30012	1.15e-11	7.04e-11
SPP1	6696	-3.16201	5.47e-15	5.18e-14
SPPL2A	84888	1.57604	3.39e-23	1.13e-21
SPRY4	81848	-1.06337	5.63e-21	1.34e-19
SPTBN2	6712	-2.09818	1.57e-37	8.13e-35
SPTLC3	55304	1.02236	1.74e-10	9.08e-10
SQLE	6713	-1.47251	8.46e-13	6.02e-12
SQRDL	58472	1.44489	1.11e-22	3.44e-21
SRI	6717	1.36716	6.56e-19	1.14e-17
SRM	6723	-1.59068	1.67e-25	8.06e-24
SRMS	6725	-1.45658	1.02e-13	8.19e-13
SRPX	8406	2.17861	1.47e-20	3.25e-19
[truncated: 314 more rows]
