# Supplementary material for: NOVA1-Mediated SORBS2 Isoform Promotes Colorectal Cancer Migration by Activating the Notch Pathway
Source: Front Cell Dev Biol. 2021 Oct 8;9:673873. doi: 10.3389/fcell.2021.673873 (PMC8531477; doi:10.3389/fcell.2021.673873)
Supplement: Supplementary file 6 [file Table_5.XLSX]

## Sheet: Sheet1
AS ID	Gene name	Gene ID	Difference	Pvalue	FDR
43473	SMIM6	100130933	0.303693	1.93e-17	5.64e-15
86336	GNE	10020	-0.205968	6.34e-05	0.000653525
75550	SLC17A4	10050	-0.348729	2.05e-15	3.92e-13
9486	LRRN2	10446	-0.306801	3.19e-14	4.72e-12
12641	SORBS1	10580	0.361354	3.18e-13	3.66e-11
52931	CGREF1	10669	0.464117	5.15e-21	2.73e-18
19307	CHEK1	1111	0.20227	1.51e-10	8.76e-09
44877	OSBPL1A	114876	0.40911	1.29e-22	9.53e-20
22665	ARHGEF25	115557	-0.299728	8.5e-16	1.77e-13
58429	NEU4	129807	-0.201521	2.15e-07	4.9e-06
76773	COL12A1	1303	-0.521871	6.96e-34	2.17e-30
86615	TRPM6	140803	0.265218	1.19e-07	2.95e-06
27299	MIPOL1	145282	-0.224517	1.45e-13	1.79e-11
31913	NRG4	145957	-0.218711	8.72e-09	2.99e-07
62950	CNTN4	152330	-0.20481	4.85e-13	5.2e-11
38443	TRPV3	162514	-0.37392	1.21e-12	1.19e-10
32395	ACAN	176	-0.441757	4.29e-18	1.39e-15
65424	DNASE1L3	1776	-0.201944	5.35e-10	2.66e-08
45099	DTNA	1837	-0.583037	6.74e-22	4.04e-19
84325	E2F5	1875	-0.317924	4.37e-16	9.58e-14
67657	ECT2	1894	0.231065	9.88e-13	9.8e-11
31823	SCAMP5	192683	0.249775	1.32e-08	4.34e-07
312	MEGF6	1953	-0.200029	2.26e-05	0.000272757
76359	SLC29A1	2030	0.259364	5.19e-14	7.22e-12
63511	FBLN2	2199	0.566371	1.32e-40	9.24e-37
18037	C11orf82	220042	0.210417	0.000749504	0.00515186
37470	PHLPP2	23035	-0.389033	1.3e-20	6.28e-18
44533	EPB41L3	23136	-0.272752	6.8e-10	3.25e-08
90565	FLNA	2316	-0.331654	1.55e-29	2.72e-26
56715	SATB2	23314	-0.226786	7.39e-10	3.49e-08
43183	ABCA5	23461	-0.201428	1.14e-06	2.11e-05
39449	TNFRSF13B	23495	0.478607	2.66e-22	1.78e-19
19150	TRIM29	23650	-0.293148	3.28e-07	7e-06
58079	SH3BP4	23677	0.259625	5.59e-08	1.55e-06
1704	GJB3	2707	-0.211854	5.03e-09	1.85e-07
11845	ANK3	288	0.447242	2.19e-18	7.48e-16
87861	NTMT1	28989	0.41765	3.35e-21	1.84e-18
91661	A1CF	29974	-0.303567	1.85e-22	1.27e-19
4366	IGSF3	3321	0.281076	7.36e-13	7.49e-11
81670	IMPDH1	3614	0.222539	7.25e-12	5.92e-10
86110	AQP7	364	-0.250009	3.5e-11	2.4e-09
12279	KCNMA1	3778	-0.299082	1.92e-13	2.3e-11
75172	PSMG4	389362	0.231514	5.17e-19	2.02e-16
19215	VWA5A	4013	-0.255082	7.25e-08	1.94e-06
72749	MEF2C	4208	0.214431	5.09e-09	1.87e-07
38843	ASGR1	432	0.355805	0.0016643	0.00998119
64191	MOBP	4336	-0.313769	2.68e-17	7.77e-15
34188	MYH11	4629	0.360428	3.53e-24	3.54e-21
18767	NCAM1	4684	-0.24512	1.4e-20	6.66e-18
9450	ATP2B4	493	0.40207	6.91e-11	4.32e-09
67616	CLDN11	5010	0.269204	1.34e-10	7.83e-09
64006	VILL	50853	0.221554	1.67e-07	3.96e-06
70294	LEF1	51176	0.270149	6.68e-10	3.21e-08
86634	PCSK5	5125	-0.346886	4.63e-18	1.48e-15
64008	PLCD1	5333	-0.308889	1.96e-16	4.78e-14
67119	PLS1	5357	-0.294823	4.46e-26	5.96e-23
31384	PAQR5	54852	-0.289689	4.76e-17	1.31e-14
22194	PPP1R1A	5502	0.25144	6.45e-06	9.34e-05
68999	C4orf19	55286	-0.22785	7.91e-09	2.76e-07
77377	PKIB	5570	0.336071	8.48e-13	8.54e-11
51263	KLK10	5655	-0.371704	9.94e-15	1.68e-12
20882	ARNTL2	56938	0.207254	1.32e-05	0.000171279
89139	SHROOM4	57477	0.217997	0.000122239	0.00113956
33175	RPS2	6187	-0.22438	6.6e-07	1.3e-05
7720	S100A2	6273	-0.405903	8.57e-11	5.21e-09
80124	CCL24	6369	-0.410141	1.16e-13	1.47e-11
11342	CXCL12	6387	-0.305839	6.77e-22	4.04e-19
31688	STRA6	64220	0.483666	2.03e-18	7.13e-16
59695	SLC13A3	64849	0.335681	4.46e-11	2.97e-09
66827	TMEM108	66000	0.303087	4.79e-14	6.83e-12
48110	CYP4F12	66002	-0.222697	2.49e-15	4.7e-13
80354	SRI	6717	-0.539642	4.65e-32	1.19e-28
35764	SULT1A2	6799	-0.22486	6.17e-13	6.44e-11
35811	SULT1A2	6799	-0.628686	8.31e-21	4.24e-18
80019	STX1A	6804	-0.278272	4.64e-12	3.93e-10
50773	SULT2B1	6820	-0.40694	1.46e-18	5.27e-16
11113	SVIL	6840	0.433623	1.04e-11	8.21e-10
11114	SVIL	6840	0.277899	7.73e-13	7.84e-11
11116	SVIL	6840	0.262079	1.02e-05	0.000138108
11993	TACR2	6865	0.344293	2.38e-09	9.59e-08
73350	TCF7	6932	0.306937	7.05e-19	2.64e-16
73338	TCF7	6932	-0.443633	1.73e-10	9.76e-09
23400	TSPAN8	7103	-0.235043	1.92e-12	1.8e-10
60821	TRPM2	7226	0.360727	4.44e-22	2.83e-19
53745	UGP2	7360	0.41724	1.77e-30	3.55e-27
54766	IL1R2	7850	0.403721	1.76e-21	1.01e-18
38196	DBNDD1	79007	0.204589	7.06e-06	0.00010087
100577	PDZD3	79849	-0.266736	2.49e-12	2.29e-10
47949	PODNL1	79883	0.335186	4.64e-13	5.03e-11
81862	CALD1	800	0.515659	4.82e-21	2.6e-18
46299	MADCAM1	8174	-0.605973	1.65e-20	7.71e-18
71687	ADAMTS12	81792	-0.22322	1.06e-11	8.3e-10
18949	TMPRSS13	84000	0.201688	1.43e-08	4.65e-07
71390	SORBS2	8470	-0.243914	2.98e-06	4.77e-05
71387	SORBS2	8470	-0.249512	4.4e-08	1.26e-06
71374	SORBS2	8470	-0.291844	5.12e-14	7.16e-12
18707	DIXDC1	85458	0.376811	1.28e-17	3.82e-15
27475	CDKL1	8814	-0.226631	7.12e-08	1.91e-06
12457	PAPSS2	9060	0.454998	1.88e-38	7.98e-35
16266	SYT7	9066	0.251489	5.6e-10	2.76e-08
74892	ADAMTS2	9509	-0.248842	7.75e-21	4.03e-18
80080	GTF2IRD1	9569	0.227207	1.02e-16	2.58e-14
15110	CD44	960	0.207522	6.82e-08	1.84e-06
37876	KIAA0513	9764	-0.208202	1.49e-10	8.63e-09
86353	MELK	9833	0.332806	1.69e-10	9.6e-09
31677	ISLR	3671	0.528834	1.6e-49	4.5e-45
97224	TMEM151B	441151	0.523666	1.61e-27	2.51e-24
96307	LRRFIP2	9209	0.506276	6.96e-32	1.63e-28
58062	UGT1A6	54578	0.484359	7.38e-19	2.73e-16
82272	KCNH2	3757	0.465195	1.43e-18	5.23e-16
140283	SLC39A14	23516	0.464374	2.61e-39	1.46e-35
58107	COL6A3	1293	0.407804	3.83e-12	3.35e-10
53582	RTN4	57142	0.400272	6.34e-24	5.94e-21
59461	HNF4A	3172	0.382707	1.41e-27	2.32e-24
80590	TMEM130	222865	0.371713	9.85e-10	4.48e-08
77427	NCOA7	135112	0.364488	1.99e-12	1.85e-10
32239	AP3B2	8120	0.351064	1.24e-09	5.46e-08
12254	VCL	7414	0.35075	5.59e-15	9.99e-13
77155	SESN1	27244	0.348317	1.12e-16	2.79e-14
50019	CYP2B6	1555	0.346633	2.78e-09	1.09e-07
25242	EP400NL	347918	0.339141	9.23e-18	2.82e-15
50375	APOC2	344	0.33741	5.06e-12	4.24e-10
53934	DYSF	8291	0.334458	5.51e-13	5.86e-11
11922	MYPN	84665	0.331153	6.25e-11	3.95e-09
26068	LMO7	4008	0.327172	6e-06	8.81e-05
86321	TMEM8B	51754	0.31823	1.55e-23	1.36e-20
20893	PPFIBP1	8496	0.314293	5.13e-14	7.16e-12
58908	DUSP15	128853	0.312864	4.55e-11	3.03e-09
69727	SEC31A	22872	0.310643	2.43e-19	9.74e-17
60875	COL18A1	80781	0.308072	1.18e-06	2.18e-05
12296	RPS24	6229	0.307446	2.84e-22	1.86e-19
28826	TTC7B	145567	0.303816	2.22e-08	6.87e-07
78057	STXBP5	134957	0.301222	6.79e-19	2.58e-16
1581	LCK	3932	0.300708	9.41e-08	2.41e-06
83064	TNFRSF10C	8794	0.299068	2.44e-13	2.86e-11
71889	FBXO4	26272	0.291104	5.34e-14	7.38e-12
11009	KIAA1217	56243	0.289085	2.86e-16	6.63e-14
31442	LARP6	55323	0.285771	2.62e-20	1.15e-17
9492	NFASC	23114	0.278786	3.39e-13	3.84e-11
55998	MLTK	51776	0.278513	5.98e-24	5.79e-21
77596	EPB41L2	2037	0.277211	2.93e-12	2.67e-10
10197	OBSCN	84033	0.275425	5.81e-08	1.6e-06
22442	GLS2	27165	0.267772	0.000521675	0.00383358
40367	CCL14	6358	0.267483	3.64e-16	8.17e-14
36567	DOK4	55715	0.267034	7.28e-13	7.43e-11
3952	AKNAD1	254268	0.264206	0.000373042	0.00288399
67936	FAM131A	131408	0.26363	1.01e-11	7.99e-10
10732	CELF2	10659	0.260656	2.06e-10	1.14e-08
13950	OSBPL5	114879	0.254403	1.64e-10	9.36e-09
64638	PLXNB1	5364	0.254129	4.89e-08	1.38e-06
65420	FLNB	2317	0.249337	2.92e-16	6.72e-14
74127	TNIP1	10318	0.248798	3.34e-13	3.82e-11
23415	TBC1D15	64786	0.246934	2.44e-16	5.81e-14
69181	CORIN	10699	0.245711	2.23e-07	5.05e-06
89858	COL4A6	1288	0.244004	2.9e-08	8.68e-07
3024	ECHDC2	55268	0.243986	2.36e-20	1.07e-17
78504	PDGFA	5154	0.241914	6.83e-10	3.26e-08
54941	ACOXL	55289	0.239015	1.39e-07	3.39e-06
76806	MYO6	4646	0.238396	1.11e-09	4.96e-08
40590	PCGF2	7703	0.237543	1.76e-07	4.14e-06
22640	DCTN2	10540	0.235563	1.4e-06	2.52e-05
68744	ABLIM2	84448	0.235508	4.16e-17	1.16e-14
43795	AFMID	125061	0.235367	3.98e-12	3.45e-10
54928	NPHP1	4867	0.234927	2.5e-08	7.59e-07
87334	TNC	3371	0.233998	2.5e-09	9.99e-08
70617	NDUFC1	4717	0.233998	2.27e-16	5.5e-14
30516	GALK2	2585	0.233832	1.4e-22	1.01e-19
88571	AP1S2	8905	0.233178	1.07e-14	1.8e-12
68071	RPL39L	116832	0.231395	7.75e-07	1.5e-05
20820	KRAS	3845	0.230836	2.38e-18	7.97e-16
60827	TSPEAR	54084	0.230683	0.000583681	0.00420774
55943	DYNC1I2	1781	0.230413	3.22e-14	4.73e-12
22472	BAZ2A	11176	0.229	3.64e-11	2.47e-09
12409	CCSER2	54462	0.228759	2.82e-09	1.1e-07
21019	BICD1	636	0.227371	4.2e-06	6.45e-05
30784	TCF12	6938	0.227035	8.64e-11	5.23e-09
2515	B4GALT2	8704	0.226581	1.35e-05	0.0001749
79731	COBL	23242	0.226167	3.83e-12	3.35e-10
34222	ABCC6	368	0.225862	8.26e-10	3.85e-08
32895	RAB11FIP3	9727	0.22515	8.06e-13	8.14e-11
85282	TRAPPC9	83696	0.223818	7.24e-16	1.55e-13
24046	PARPBP	55010	0.222097	4.07e-07	8.47e-06
26983	NFATC4	4776	0.221803	8.82e-08	2.29e-06
90874	COL16A1	1307	0.221611	0.000636434	0.00451274
47903	NFIX	4784	0.221521	6.74e-07	1.32e-05
12153	PPP3CB	5532	0.22122	3.78e-25	4.42e-22
12060	CDH23	64072	0.219825	7.72e-15	1.33e-12
33212	MLST8	64223	0.21866	5.73e-14	7.89e-12
50642	MEIS3	56917	0.218622	1.32e-15	2.61e-13
26701	ACIN1	22985	0.218387	8.62e-21	4.32e-18
50346	BCAM	4059	0.216767	1.86e-19	7.67e-17
68331	IQCG	84223	0.216302	1.67e-07	3.96e-06
68440	IDUA	3425	0.21516	1.86e-07	4.34e-06
14793	MPPED2	744	0.213931	2.71e-07	5.95e-06
13493	LRRC27	80313	0.212477	8.21e-09	2.84e-07
21952	CSAD	51380	0.212207	8.73e-13	8.75e-11
12935	LDB1	8861	0.211968	8.6e-14	1.12e-11
25222	ULK1	8408	0.211395	1.62e-10	9.27e-09
33743	HMOX2	3163	0.209402	1.36e-09	5.89e-08
69017	TBC1D1	23216	0.208963	2.91e-09	1.13e-07
7711	S100A4	6275	0.208394	4.5e-10	2.28e-08
68307	KIAA0226	9711	0.207688	2.74e-06	4.45e-05
1731	CLSPN	63967	0.207421	1.39e-09	6.01e-08
85260	ST3GAL1	6482	0.206969	4.97e-08	1.4e-06
64721	SLC26A6	65010	0.205892	1.57e-14	2.5e-12
32782	WASH4P	374677	0.205466	2.09e-12	1.94e-10
25200	RIMBP2	23504	0.204931	1.52e-07	3.67e-06
78950	KLHL7	55975	0.204927	3.3e-16	7.54e-14
38081	ANKRD11	29123	0.203866	3.02e-18	9.86e-16
307	ARHGEF16	27237	0.203317	2.92e-06	4.69e-05
3817	SLC44A3	126969	0.20331	1.39e-13	1.73e-11
53478	MCFD2	90411	0.202555	4.83e-09	1.79e-07
86892	FGD3	89846	0.20202	2.1e-05	0.000254812
88472	ARHGAP6	395	0.20044	6.14e-14	8.41e-12
44841	ANKRD29	147463	0.200324	6.52e-09	2.33e-07
77133	SCML4	256380	-0.202748	3.32e-05	0.000378733
85325	DENND3	22898	-0.203243	1.55e-06	2.73e-05
49492	HKR1	284459	-0.203377	5.94e-07	1.19e-05
87818	FAM73B	84895	-0.203534	3.39e-13	3.84e-11
22063	MAP3K12	7786	-0.203621	2.98e-05	0.00034462
71271	ING2	3622	-0.204052	1.57e-14	2.5e-12
42302	SPOP	8405	-0.205925	9.03e-10	4.16e-08
44278	GPS1	2873	-0.206232	2.77e-10	1.49e-08
33828	ANKS3	124401	-0.206601	4.06e-09	1.53e-07
9709	RCOR3	55758	-0.206641	1.09e-11	8.49e-10
48769	ZNF493	284443	-0.207526	6.77e-11	4.24e-09
73806	DIAPH1	1729	-0.209888	1.35e-09	5.89e-08
62205	PLA2G6	8398	-0.210655	1.05e-08	3.55e-07
13108	ACSL5	51703	-0.211159	1.07e-15	2.17e-13
51030	IRF3	3661	-0.211184	9.99e-06	0.00013547
48384	RPL18A	6142	-0.2123	8.27e-07	1.6e-05
15704	NR1H3	10062	-0.212627	7.35e-06	0.000104213
392358	SULT1A3	6818	-0.212898	2.19e-08	6.78e-07
78911	ABCB5	340273	-0.215076	2.67e-09	1.05e-07
27005	SDR39U1	56948	-0.215527	1.14e-08	3.84e-07
22295	DGKA	1606	-0.21609	8.89e-08	2.31e-06
46654	TLE2	7089	-0.216462	1.65e-13	2.01e-11
24188	MTERFD3	80298	-0.217409	7.42e-11	4.56e-09
52471	ZNF446	55663	-0.217744	7.49e-14	1.01e-11
70148	UBE2D3	7323	-0.218016	1.88e-14	2.94e-12
22414	COQ10A	93058	-0.21847	6.62e-09	2.36e-07
937	HP1BP3	50809	-0.219093	1.96e-11	1.43e-09
76607	PHF3	23469	-0.220819	1.56e-13	1.91e-11
1406	EPB41	2035	-0.221106	2.29e-09	9.24e-08
33179	GFER	2671	-0.2222	9.35e-14	1.21e-11
84041	MCMDC2	157777	-0.222862	1.33e-13	1.66e-11
49479	HKR1	284459	-0.223917	8.59e-14	1.12e-11
19899	LPAR5	57121	-0.224872	1.24e-11	9.44e-10
87550	RABEPK	10244	-0.225689	3.2e-13	3.67e-11
38115	CDK10	8558	-0.226441	1.34e-14	2.18e-12
57422	RPL37A	6168	-0.226699	1.44e-07	3.5e-06
62790	TRABD	80305	-0.2269	9.26e-16	1.91e-13
36710	BEAN1	146227	-0.228544	3.43e-08	1e-06
59544	DBNDD2	55861	-0.22899	6.83e-17	1.81e-14
17483	IL18BP	10068	-0.232117	2.04e-06	3.47e-05
73673	APBB3	10307	-0.23421	3.13e-10	1.66e-08
14580	SAA2	6288	-0.234652	1.65e-06	2.88e-05
26142	MBNL2	10150	-0.235535	4.49e-13	4.88e-11
12645	ALDH18A1	5832	-0.236856	3.79e-11	2.57e-09
30409	SHF	90525	-0.237023	2.03e-11	1.46e-09
74563	ERGIC1	57222	-0.238513	0.000381722	0.00294109
64461	ALS2CL	259173	-0.238617	1.06e-11	8.3e-10
25202	STX2	2054	-0.239686	1.13e-09	5.03e-08
62733	FAM19A5	25817	-0.239887	1.33e-08	4.35e-07
61266	TOP3B	8940	-0.239924	1.2e-11	9.18e-10
63872	CLASP2	23122	-0.240717	6.7e-13	6.92e-11
39770	ALDH3A1	218	-0.242066	2.67e-08	8.05e-07
68431	TMEM175	84286	-0.242633	3.28e-14	4.8e-12
77269	FYN	2534	-0.242679	6.02e-08	1.64e-06
19519	NTM	50863	-0.243445	1.65e-09	6.99e-08
21605	FMNL3	91010	-0.244096	6.45e-10	3.11e-08
38892	CLDN7	1366	-0.24556	4.55e-25	5.11e-22
70169	SLC9B2	133308	-0.246299	1.28e-08	4.22e-07
410	TNFRSF25	8718	-0.246396	1.05e-10	6.2e-09
59434	SRSF6	6431	-0.246948	1.5e-14	2.41e-12
87993	C9orf9	11092	-0.248319	1.17e-07	2.92e-06
39971	NEK8	284086	-0.250277	2.18e-05	0.000263805
12405	CCSER2	54462	-0.252337	4.53e-05	0.000492639
70189	TET2	54790	-0.252976	3.56e-07	7.52e-06
62206	PLA2G6	8398	-0.25338	5.42e-08	1.51e-06
86883	BICD2	23299	-0.25434	8.59e-11	5.21e-09
47503	ICAM3	3385	-0.254354	1.72e-09	7.24e-08
62619	PRR5	55615	-0.255058	1.34e-07	3.29e-06
66940	NCK1	4690	-0.256705	1.85e-11	1.36e-09
52100	RPL28	6158	-0.256942	7.35e-06	0.000104213
68809	CC2D2A	57545	-0.257537	2.13e-09	8.72e-08
30218	CCNDBP1	23582	-0.258693	6.58e-09	2.35e-07
50522	DMPK	1760	-0.259073	3.96e-12	3.45e-10
9012	SUCO	51430	-0.262446	4.82e-13	5.19e-11
35634	ERN2	10595	-0.263009	3e-17	8.61e-15
9344	KIF21B	23046	-0.264044	1.59e-08	5.12e-07
32441	WDR93	56964	-0.265722	9.63e-07	1.83e-05
17652	ATG16L2	89849	-0.268421	1.27e-11	9.64e-10
17288	TCIRG1	10312	-0.269478	2.92e-13	3.39e-11
85980	MLLT3	4300	-0.270013	3.95e-10	2.02e-08
44177	FAM195B	348262	-0.270887	2.91e-06	4.69e-05
53186	RASGRP3	25780	-0.270903	9.18e-07	1.75e-05
87348	TNC	3371	-0.271536	1.03e-08	3.48e-07
33364	CCDC64B	146439	-0.273948	6.87e-18	2.12e-15
13807	CHID1	66005	-0.273974	4.43e-08	1.26e-06
82778	MSR1	4481	-0.27737	1.66e-25	2.03e-22
88735	GK	2710	-0.281191	1.02e-19	4.34e-17
67324	MBNL1	4154	-0.282593	6.13e-18	1.93e-15
36618	CNGB1	1258	-0.284969	7.3e-16	1.55e-13
18813	NNMT	4837	-0.291521	2.1e-12	1.94e-10
50645	MEIS3	56917	-0.295172	6.75e-17	1.8e-14
42865	BCAS3	54828	-0.296376	2.41e-20	1.08e-17
66521	KALRN	8997	-0.299844	7.34e-15	1.3e-12
84267	TPD52	7163	-0.30449	1.88e-19	7.67e-17
63468	RPL32	6161	-0.310199	1.54e-15	3.03e-13
78642	FOXK1	221937	-0.31134	2.25e-13	2.65e-11
58391	THAP4	51078	-0.313694	7.18e-11	4.46e-09
79208	NT5C3A	51251	-0.314405	4.1e-23	3.29e-20
86971	CDC14B	8555	-0.315637	1.18e-14	1.94e-12
39052	DNAH2	146754	-0.316503	1.1e-09	4.92e-08
58304	C2orf54	79919	-0.318685	3.68e-12	3.26e-10
59037	ACSS2	55902	-0.321802	4.82e-13	5.19e-11
87357	TNC	3371	-0.33473	7.41e-17	1.94e-14
20982	FAM60A	58516	-0.348684	3.75e-41	3.51e-37
14952	ELF5	2001	-0.355503	1.11e-05	0.000147526
24688	WSB2	55884	-0.356079	1.29e-22	9.53e-20
29103	SERPINA1	5265	-0.35994	1.36e-17	4.02e-15
86209	IL11RA	3590	-0.360383	4e-13	4.43e-11
47047	CRB3	92359	-0.385824	1.27e-31	2.74e-28
38130	VPS9D1	9605	-0.390705	9.42e-25	9.8e-22
63467	RPL32	6161	-0.406713	2.55e-21	1.43e-18
83005	SLC39A14	23516	-0.407425	1.31e-36	4.61e-33
58720	KIF16B	55614	-0.413462	7.13e-27	1e-23
60878	SLC19A1	6573	-0.434047	1.1e-22	8.61e-20
62616	PRR5	55615	-0.455354	1.32e-12	1.28e-10
89302	ARHGEF9	23229	-0.467159	1.51e-42	2.11e-38
58104	COL6A3	1293	-0.467555	1.99e-38	7.98e-35
29104	SERPINA1	5265	-0.47056	1.69e-22	1.19e-19
7300	CD160	11126	-0.491724	5.6e-09	2.04e-07
29123	SERPINA1	5265	-0.514074	3.86e-27	5.71e-24
29115	SERPINA1	5265	-0.540581	5.57e-26	7.1e-23
62574	TTLL12	23170	-0.583256	3.14e-33	8.82e-30
98066	KCNK9	51305	-0.68364	1.07e-07	2.7e-06
